# Supplementary material for: Predisposition to Cancer Caused by Genetic and Functional Defects of Mammalian Atad5
Source: PubMed Central journal article supplement (PMC3161924; doi:10.1371/journal.pgen.1002245), 2011-08-25
Supplement: pgen.1002245.s005.pdf [file pgen.1002245.s005.pdf]

Table S1. Regions of copy number alteration and the corresponding genes among four tumors from Atad5+/m mice.

| ChrNumber | ProbeName      | Start     | Stop      | Deletion | Amplification |
|-----------|----------------|-----------|-----------|----------|---------------|
| chr1      | A_67_P04010830 | 9884081   | 9884140   | 0        | 25            |
| chr1      | A_53_P127556   | 17723913  | 17723972  | 0        | 25            |
| chr1      | A_53_P127556   | 17723913  | 17723972  | 0        | 25            |
| chr1      | A_53_P127556   | 17723913  | 17723972  | 0        | 25            |
| chr1      | A_53_P127501   | 17741507  | 17741566  | 0        | 25            |
| chr1      | A_67_P04055333 | 32621242  | 32621301  | 25       | 0             |
| chr1      | A_53_P163710   | 36210559  | 36210618  | 0        | 25            |
| chr1      | A_53_P111377   | 39494205  | 39494264  | 0        | 25            |
| chr1      | A_67_P04111240 | 58801090  | 58801149  | 0        | 25            |
| chr1      | A_67_P00100290 | 72235377  | 72235436  | 25       | 0             |
| chr1      | A_67_P04212616 | 106703566 | 106703625 | 25       | 0             |
| chr1      | A_67_P04316715 | 157349593 | 157349652 | 50       | 0             |
| chr1      | A_67_P00238028 | 165814781 | 165814840 | 0        | 25            |
| chr1      | A_67_P00247956 | 171555916 | 171555975 | 0        | 25            |
| chr1      | A_67_P04379846 | 184316327 | 184316386 | 0        | 25            |
| chr2      | A_53_P122881   | 4900498   | 4900557   | 0        | 25            |
| chr2      | A_53_P140447   | 29688284  | 29688338  | 25       | 0             |
| chr2      | A_53_P140339   | 29690643  | 29690702  | 25       | 0             |
| chr2      | A_53_P126333   | 29694550  | 29694604  | 25       | 0             |
| chr2      | A_53_P149149   | 30007128  | 30007187  | 0        | 25            |
| chr2      | A_53_P142959   | 38182019  | 38182069  | 25       | 0             |
| chr2      | A_53_P142959   | 38182019  | 38182069  | 25       | 0             |
| chr2      | A_53_P142959   | 38182019  | 38182069  | 25       | 0             |
| chr2      | A_67_P04497742 | 42163870  | 42163929  | 50       | 0             |
| chr2      | A_53_P124470   | 65156156  | 65156214  | 0        | 25            |
| chr2      | A_67_P04546499 | 65179814  | 65179873  | 0        | 25            |
| chr2      | A_67_P04546499 | 65179814  | 65179873  | 0        | 25            |
| chr2      | A_67_P04546499 | 65179814  | 65179873  | 0        | 25            |
| chr2      | A_67_P04610311 | 93668807  | 93668866  | 25       | 0             |
| chr2      | A_53_P143963   | 102910708 | 102910767 | 25       | 0             |
| chr2      | A_53_P130345   | 127057207 | 127057258 | 0        | 50            |
| chr2      | A_53_P165807   | 127057461 | 127057519 | 0        | 50            |
| chr2      | A_53_P146037   | 127058196 | 127058246 | 0        | 50            |
| chr2      | A_53_P142604   | 127078793 | 127078852 | 0        | 50            |
| chr2      | A_53_P142604   | 127078793 | 127078852 | 0        | 50            |
| chr2      | A_53_P142604   | 127078793 | 127078852 | 0        | 50            |
| chr2      | A_53_P175034   | 132537535 | 132537594 | 0        | 25            |
| chr2      | A_53_P122355   | 132546377 | 132546436 | 0        | 25            |
| chr2      | A_53_P108325   | 132555577 | 132555636 | 0        | 25            |
| chr2      | A_67_P04754545 | 157053447 | 157053506 | 25       | 0             |
| chr2      | A_53_P133949   | 167875056 | 167875115 | 25       | 0             |
| chr2      | A_53_P138401   | 167892101 | 167892160 | 25       | 0             |
| chr2      | A_53_P137188   | 167895601 | 167895660 | 25       | 0             |
| chr2      | A_53_P137188   | 167895601 | 167895660 | 25       | 0             |
| chr2      | A_53_P137188   | 167895601 | 167895660 | 25       | 0             |
| chr2      | A_53_P173360   | 167901807 | 167901866 | 25       | 0             |
| chr2      | A_53_P130759   | 172627871 | 172627930 | 50       | 0             |
| chr2      | A_53_P150980   | 172634873 | 172634932 | 50       | 0             |
| chr2      | A_53_P119738   | 172645445 | 172645504 | 50       | 0             |
| chr2      | A_53_P124390   | 181599311 | 181599370 | 25       | 0             |
| chr3      | A_53_P165905   | 67061180  | 67061239  | 25       | 0             |
| chr3      | A_53_P165905   | 67061180  | 67061239  | 25       | 0             |
| chr3      | A_53_P165905   | 67061180  | 67061239  | 25       | 0             |
| chr3      | A_53_P111210   | 67063507  | 67063566  | 25       | 0             |
| chr3      | A_53_P144597   | 67068194  | 67068253  | 25       | 0             |
| chr3      | A_53_P168889   | 105097650 | 105097709 | 25       | 0             |
| chr3      | A_67_P05025592 | 108722263 | 108722322 | 0        | 25            |
| chr3      | A_53_P104868   | 127553166 | 127553225 | 0        | 25            |
| chr3      | A_53_P153389   | 127554177 | 127554236 | 0        | 25            |
| chr3      | A_53_P119858   | 127578083 | 127578142 | 0        | 25            |
| chr3      | A_53_P119858   | 127578083 | 127578142 | 0        | 25            |
| chr3      | A_53_P119858   | 127578083 | 127578142 | 0        | 25            |
| chr4      | A_53_P171194   | 6871304   | 6871363   | 25       | 0             |
| chr4      | A_53_P117023   | 25292463  | 25292522  | 0        | 25            |
| chr4      | A_53_P158856   | 108075973 | 108076032 | 25       | 0             |
| chr4      | A_53_P153893   | 116145076 | 116145135 | 0        | 25            |
| chr4      | A_53_P175041   | 116148266 | 116148325 | 0        | 25            |
| chr4      | A_53_P119710   | 116189464 | 116189523 | 0        | 25            |
| chr4      | A_53_P119710   | 116189464 | 116189523 | 0        | 25            |
| chr4      | A_53_P119710   | 116189464 | 116189523 | 0        | 25            |
| chr4      | A_53_P141513   | 116201120 | 116201179 | 0        | 25            |
| chr4      | A_67_P00991319 | 131533937 | 131533996 | 25       | 0             |
| chr4      | A_53_P153557   | 131547829 | 131547888 | 25       | 0             |
| chr4      | A_53_P179626   | 135292419 | 135292478 | 0        | 25            |
| chr4      | A_53_P127264   | 143718531 | 143718590 | 25       | 0             |
| chr4      | A_53_P127264   | 143718531 | 143718590 | 25       | 0             |
| chr4      | A_53_P127264   | 143718531 | 143718590 | 25       | 0             |
| chr4      | A_53_P176506   | 143718719 | 143718778 | 25       | 0             |
| chr4      | A_53_P159738   | 143719730 | 143719789 | 25       | 0             |
| chr4      | A_53_P135204   | 143727277 | 143727336 | 25       | 0             |
| chr4      | A_53_P149697   | 154036955 | 154037014 | 25       | 0             |
| chr5      | A_67_P01045598 | 17326606  | 17326665  | 25       | 0             |
| chr5      | A_53_P126590   | 23170604  | 23170663  | 0        | 25            |
| chr5      | A_53_P126590   | 23170604  | 23170663  | 0        | 25            |
| chr5      | A_53_P126590   | 23170604  | 23170663  | 0        | 25            |
| chr5      | A_53_P138609   | 23193207  | 23193266  | 0        | 25            |
| chr5      | A_53_P135438   | 33414961  | 33415020  | 0        | 25            |
| chr5      | A_67_P01077607 | 38089212  | 38089271  | 25       | 0             |
| chr5      | A_53_P108165   | 38108535  | 38108594  | 25       | 0             |
| chr5      | A_53_P175486   | 38109073  | 38109119  | 25       | 0             |

|      |                |           |           |    |    |
|------|----------------|-----------|-----------|----|----|
| chr5 | A_53_P123082   | 38109346  | 38109390  | 25 | 0  |
| chr5 | A_53_P162874   | 38111207  | 38111260  | 25 | 0  |
| chr5 | A_53_P173329   | 38113363  | 38113417  | 25 | 0  |
| chr5 | A_53_P128190   | 66556144  | 66556203  | 0  | 25 |
| chr5 | A_53_P171803   | 96198914  | 96198970  | 0  | 25 |
| chr5 | A_53_P174588   | 96211239  | 96211298  | 0  | 25 |
| chr5 | A_53_P167185   | 111078276 | 111078335 | 0  | 25 |
| chr5 | A_53_P122821   | 114719268 | 114719327 | 0  | 25 |
| chr5 | A_53_P168074   | 119026225 | 119026284 | 0  | 25 |
| chr5 | A_53_P124387   | 124864339 | 124864398 | 0  | 25 |
| chr5 | A_53_P172781   | 125678195 | 125678254 | 25 | 0  |
| chr5 | A_67_P05743100 | 130129644 | 130129703 | 25 | 0  |
| chr5 | A_53_P137728   | 136404662 | 136404715 | 25 | 0  |
| chr6 | A_53_P176344   | 18046851  | 18046910  | 25 | 0  |
| chr6 | A_53_P161420   | 40379374  | 40379430  | 25 | 0  |
| chr6 | A_53_P133411   | 51379645  | 51379704  | 0  | 25 |
| chr6 | A_53_P107943   | 51386191  | 51386250  | 0  | 25 |
| chr6 | A_53_P116958   | 53749223  | 53749268  | 0  | 25 |
| chr6 | A_53_P163759   | 53751299  | 53751358  | 0  | 25 |
| chr6 | A_67_P05912680 | 58269139  | 58269198  | 25 | 0  |
| chr6 | A_53_P142840   | 64648433  | 64648492  | 0  | 25 |
| chr6 | A_67_P01346282 | 64649017  | 64649076  | 0  | 25 |
| chr6 | A_67_P05924178 | 64668172  | 64668231  | 0  | 25 |
| chr6 | A_53_P166406   | 64669896  | 64669953  | 0  | 25 |
| chr6 | A_53_P177216   | 64671111  | 64671170  | 0  | 25 |
| chr6 | A_67_P05928394 | 66896082  | 66896141  | 0  | 25 |
| chr6 | A_53_P159421   | 81891515  | 81891574  | 0  | 25 |
| chr6 | A_53_P121320   | 83736104  | 83736163  | 25 | 0  |
| chr6 | A_53_P140954   | 90314274  | 90314333  | 0  | 25 |
| chr6 | A_53_P166377   | 90439821  | 90439880  | 0  | 25 |
| chr6 | A_53_P132201   | 92026420  | 92026476  | 0  | 25 |
| chr6 | A_53_P163911   | 92041255  | 92041314  | 0  | 25 |
| chr6 | A_53_P145850   | 92042425  | 92042484  | 0  | 25 |
| chr6 | A_53_P125111   | 113504292 | 113504351 | 0  | 25 |
| chr6 | A_53_P102294   | 113504962 | 113505021 | 0  | 25 |
| chr6 | A_53_P121700   | 114398210 | 114398269 | 0  | 25 |
| chr6 | A_53_P121700   | 114398210 | 114398269 | 0  | 25 |
| chr6 | A_53_P121700   | 114398210 | 114398269 | 0  | 25 |
| chr6 | A_53_P163903   | 115742122 | 115742178 | 0  | 25 |
| chr6 | A_53_P163903   | 115742122 | 115742178 | 0  | 25 |
| chr6 | A_53_P163903   | 115742122 | 115742178 | 0  | 25 |
| chr6 | A_53_P165299   | 122301705 | 122301764 | 0  | 25 |
| chr6 | A_53_P130502   | 129363053 | 129363112 | 0  | 25 |
| chr6 | A_53_P170910   | 132533042 | 132533101 | 0  | 25 |
| chr6 | A_53_P110677   | 132536497 | 132536556 | 0  | 25 |
| chr6 | A_67_P06090397 | 140487543 | 140487602 | 0  | 50 |
| chr6 | A_67_P06090397 | 140487543 | 140487602 | 0  | 50 |
| chr6 | A_67_P06090397 | 140487543 | 140487602 | 0  | 50 |
| chr7 | A_53_P175668   | 19185030  | 19185089  | 0  | 50 |
| chr7 | A_53_P161898   | 19188507  | 19188566  | 0  | 50 |
| chr7 | A_53_P136562   | 30274044  | 30274092  | 25 | 0  |
| chr7 | A_53_P136316   | 30276685  | 30276741  | 25 | 0  |
| chr7 | A_53_P167236   | 30287447  | 30287496  | 25 | 0  |
| chr7 | A_53_P163206   | 44394346  | 44394391  | 25 | 0  |
| chr7 | A_53_P113508   | 44419097  | 44419156  | 25 | 0  |
| chr7 | A_53_P107873   | 45558921  | 45558977  | 25 | 0  |
| chr7 | A_53_P119967   | 47474727  | 47474786  | 0  | 50 |
| chr7 | A_53_P147158   | 102452475 | 102452519 | 25 | 0  |
| chr7 | A_53_P149239   | 102461767 | 102461815 | 25 | 0  |
| chr7 | A_67_P06334011 | 115801929 | 115801988 | 25 | 0  |
| chr7 | A_67_P06385766 | 136789565 | 136789624 | 0  | 25 |
| chr7 | A_53_P114561   | 141202973 | 141203032 | 0  | 25 |
| chr7 | A_53_P114840   | 141312737 | 141312796 | 25 | 0  |
| chr7 | A_53_P124983   | 141321624 | 141321668 | 25 | 0  |
| chr7 | A_53_P158538   | 141324859 | 141324909 | 25 | 0  |
| chr7 | A_53_P101441   | 141325525 | 141325576 | 25 | 0  |
| chr7 | A_53_P147986   | 141325836 | 141325882 | 25 | 0  |
| chr7 | A_53_P120897   | 141331624 | 141331683 | 25 | 0  |
| chr7 | A_53_P129660   | 141336674 | 141336733 | 25 | 0  |
| chr8 | A_53_P140537   | 10006559  | 10006617  | 0  | 25 |
| chr8 | A_53_P119390   | 23895107  | 23895166  | 25 | 0  |
| chr8 | A_53_P104738   | 55600809  | 55600868  | 25 | 0  |
| chr8 | A_53_P104738   | 55600809  | 55600868  | 25 | 0  |
| chr8 | A_53_P104738   | 55600809  | 55600868  | 25 | 0  |
| chr8 | A_67_P06529067 | 63773877  | 63773936  | 25 | 0  |
| chr8 | A_67_P06540414 | 69431029  | 69431088  | 0  | 25 |
| chr8 | A_67_P06540813 | 69645876  | 69645935  | 0  | 25 |
| chr8 | A_67_P01761875 | 72688021  | 72688080  | 25 | 25 |
| chr8 | A_53_P153143   | 72697767  | 72697826  | 25 | 25 |
| chr8 | A_53_P153143   | 72697767  | 72697826  | 25 | 25 |
| chr8 | A_53_P153143   | 72697767  | 72697826  | 25 | 25 |
| chr8 | A_53_P126910   | 72698917  | 72698976  | 25 | 25 |
| chr8 | A_53_P156271   | 72700060  | 72700119  | 25 | 25 |
| chr8 | A_53_P156271   | 72700060  | 72700119  | 25 | 25 |
| chr8 | A_53_P156271   | 72700060  | 72700119  | 25 | 25 |
| chr8 | A_67_P06546672 | 72721301  | 72721360  | 50 | 25 |
| chr8 | A_67_P06558081 | 78030417  | 78030476  | 25 | 0  |
| chr8 | A_53_P123989   | 86323615  | 86323674  | 0  | 25 |
| chr8 | A_53_P157640   | 86328704  | 86328763  | 0  | 25 |
| chr8 | A_53_P103525   | 86870864  | 86870912  | 25 | 0  |
| chr8 | A_67_P01785026 | 88298941  | 88299000  | 25 | 0  |
| chr8 | A_53_P169689   | 88308075  | 88308134  | 25 | 0  |

|       |                |           |           |    |    |
|-------|----------------|-----------|-----------|----|----|
| chr8  | A_53_P133367   | 88310330  | 88310389  | 25 | 0  |
| chr8  | A_53_P130056   | 97113053  | 97113112  | 25 | 25 |
| chr8  | A_53_P130056   | 97113053  | 97113112  | 25 | 25 |
| chr8  | A_53_P130056   | 97113053  | 97113112  | 25 | 25 |
| chr8  | A_53_P134681   | 97122574  | 97122633  | 25 | 0  |
| chr8  | A_53_P134681   | 97122574  | 97122633  | 25 | 0  |
| chr8  | A_53_P134681   | 97122574  | 97122633  | 25 | 0  |
| chr8  | A_53_P151421   | 97977104  | 97977163  | 25 | 0  |
| chr8  | A_53_P117960   | 97994145  | 97994204  | 25 | 0  |
| chr8  | A_53_P128807   | 108158406 | 108158465 | 0  | 25 |
| chr8  | A_53_P139728   | 108163589 | 108163647 | 0  | 25 |
| chr8  | A_67_P06642295 | 114380612 | 114380671 | 25 | 0  |
| chr8  | A_67_P06673097 | 126685325 | 126685384 | 25 | 0  |
| chr8  | A_53_P170387   | 126703183 | 126703242 | 25 | 0  |
| chr8  | A_53_P125806   | 127759543 | 127759602 | 25 | 0  |
| chr8  | A_53_P132183   | 127779173 | 127779232 | 25 | 0  |
| chr8  | A_53_P132183   | 127779173 | 127779232 | 25 | 0  |
| chr8  | A_53_P132183   | 127779173 | 127779232 | 25 | 0  |
| chr8  | A_53_P120427   | 127779694 | 127779753 | 25 | 0  |
| chr8  | A_53_P101229   | 127781274 | 127781333 | 25 | 0  |
| chr8  | A_53_P120650   | 127796302 | 127796361 | 25 | 0  |
| chr9  | A_53_P139458   | 20867691  | 20867747  | 25 | 0  |
| chr9  | A_53_P150466   | 21023842  | 21023901  | 25 | 0  |
| chr9  | A_53_P162938   | 21023844  | 21023902  | 25 | 0  |
| chr9  | A_67_P01881858 | 21034772  | 21034831  | 25 | 0  |
| chr9  | A_67_P01882231 | 21243514  | 21243573  | 25 | 0  |
| chr9  | A_53_P126751   | 21830204  | 21830263  | 25 | 0  |
| chr9  | A_53_P173333   | 39159483  | 39159542  | 25 | 0  |
| chr9  | A_53_P125743   | 46020556  | 46020615  | 25 | 0  |
| chr9  | A_67_P06818387 | 63908740  | 63908799  | 25 | 0  |
| chr9  | A_67_P01969536 | 72476042  | 72476101  | 0  | 25 |
| chr9  | A_53_P158355   | 100757025 | 100757084 | 25 | 25 |
| chr9  | A_53_P158355   | 100757025 | 100757084 | 25 | 25 |
| chr9  | A_53_P158355   | 100757025 | 100757084 | 25 | 25 |
| chr9  | A_53_P162858   | 100766218 | 100766277 | 0  | 25 |
| chr9  | A_53_P162858   | 100766218 | 100766277 | 0  | 25 |
| chr9  | A_53_P162858   | 100766218 | 100766277 | 0  | 25 |
| chr9  | A_53_P112402   | 100781741 | 100781800 | 25 | 25 |
| chr9  | A_53_P117142   | 108240429 | 108240488 | 0  | 25 |
| chr10 | A_67_P06966003 | 6571112   | 65711171  | 25 | 0  |
| chr10 | A_67_P06966068 | 6595657   | 6595716   | 25 | 0  |
| chr10 | A_67_P06966068 | 6595657   | 6595716   | 25 | 0  |
| chr10 | A_67_P06966068 | 6595657   | 6595716   | 25 | 0  |
| chr10 | A_67_P06974685 | 10521792  | 10521851  | 50 | 0  |
| chr10 | A_67_P06974704 | 10537281  | 10537340  | 50 | 0  |
| chr10 | A_67_P06974704 | 10537281  | 10537340  | 50 | 0  |
| chr10 | A_67_P06974704 | 10537281  | 10537340  | 50 | 0  |
| chr10 | A_53_P180466   | 51444579  | 51444638  | 0  | 25 |
| chr10 | A_53_P120731   | 51447163  | 51447222  | 0  | 25 |
| chr10 | A_53_P120731   | 51447163  | 51447222  | 0  | 25 |
| chr10 | A_53_P120731   | 51447163  | 51447222  | 0  | 25 |
| chr10 | A_53_P179423   | 74979039  | 74979095  | 0  | 25 |
| chr10 | A_53_P104449   | 78690108  | 78690167  | 25 | 0  |
| chr10 | A_53_P171067   | 78712875  | 78712934  | 25 | 0  |
| chr10 | A_53_P101125   | 79386680  | 79386732  | 25 | 0  |
| chr10 | A_67_P07121650 | 79551705  | 79551759  | 25 | 0  |
| chr10 | A_67_P02168468 | 79560111  | 79560170  | 25 | 0  |
| chr10 | A_53_P110235   | 80029727  | 80029786  | 25 | 0  |
| chr10 | A_53_P103331   | 80737944  | 80737990  | 25 | 0  |
| chr10 | A_53_P140786   | 80741755  | 80741812  | 25 | 0  |
| chr10 | A_53_P139712   | 80751620  | 80751677  | 25 | 0  |
| chr10 | A_67_P02170711 | 80758816  | 80758875  | 25 | 0  |
| chr10 | A_53_P160230   | 80896536  | 80896580  | 25 | 0  |
| chr10 | A_53_P158295   | 80905798  | 80905848  | 25 | 0  |
| chr10 | A_67_P02171033 | 80914889  | 80914948  | 25 | 0  |
| chr10 | A_53_P172610   | 80926954  | 80927005  | 25 | 0  |
| chr10 | A_67_P07180313 | 105155301 | 105155360 | 0  | 25 |
| chr10 | A_53_P102134   | 127134674 | 127134733 | 25 | 0  |
| chr11 | A_53_P154523   | 49929144  | 49929195  | 0  | 25 |
| chr11 | A_67_P02330042 | 54925251  | 54925308  | 0  | 25 |
| chr11 | A_53_P102218   | 54944222  | 54944281  | 0  | 25 |
| chr11 | A_53_P113782   | 54950125  | 54950184  | 0  | 25 |
| chr11 | A_53_P152998   | 60053092  | 60053137  | 0  | 25 |
| chr11 | A_53_P179821   | 60054094  | 60054147  | 0  | 25 |
| chr11 | A_53_P151013   | 60054326  | 60054371  | 0  | 25 |
| chr11 | A_53_P155742   | 60719571  | 60719630  | 0  | 25 |
| chr11 | A_53_P106635   | 60722980  | 60723036  | 0  | 25 |
| chr11 | A_53_P137263   | 60741985  | 60742044  | 0  | 25 |
| chr11 | A_53_P127978   | 60745553  | 60745612  | 0  | 25 |
| chr11 | A_53_P179944   | 77729608  | 77729666  | 25 | 0  |
| chr11 | A_53_P115779   | 94055296  | 94055355  | 25 | 0  |
| chr11 | A_53_P163046   | 94055785  | 94055840  | 25 | 0  |
| chr11 | A_53_P158758   | 94056647  | 94056699  | 25 | 0  |
| chr11 | A_67_P07447225 | 94073941  | 94074000  | 25 | 0  |
| chr11 | A_53_P158918   | 94489888  | 94489947  | 0  | 25 |
| chr11 | A_53_P125833   | 94829857  | 94829916  | 25 | 0  |
| chr11 | A_53_P145038   | 94838417  | 94838476  | 25 | 0  |
| chr11 | A_53_P139517   | 94842731  | 94842781  | 25 | 0  |
| chr11 | A_53_P120174   | 112503933 | 112503988 | 0  | 25 |
| chr11 | A_53_P140072   | 118149288 | 118149347 | 25 | 0  |
| chr11 | A_53_P105331   | 121532307 | 121532366 | 0  | 25 |
| chr11 | A_53_P105331   | 121532307 | 121532366 | 0  | 25 |

|       |                |           |           |    |    |
|-------|----------------|-----------|-----------|----|----|
| chr11 | A_53_P105331   | 121532307 | 121532366 | 0  | 25 |
| chr12 | A_67_P07540943 | 12362435  | 12362494  | 25 | 0  |
| chr12 | A_67_P07583382 | 34526953  | 34527012  | 25 | 0  |
| chr12 | A_67_P07583401 | 34537196  | 34537255  | 25 | 0  |
| chr12 | A_53_P140161   | 45076245  | 45076304  | 25 | 0  |
| chr12 | A_67_P07604830 | 45086611  | 45086670  | 25 | 0  |
| chr12 | A_67_P07629427 | 57246480  | 57246539  | 0  | 25 |
| chr12 | A_67_P07663410 | 74001467  | 74001526  | 0  | 25 |
| chr12 | A_53_P153412   | 81886135  | 81886192  | 0  | 25 |
| chr12 | A_53_P122053   | 99200727  | 99200786  | 0  | 25 |
| chr12 | A_53_P101282   | 103801250 | 103801309 | 0  | 25 |
| chr12 | A_53_P178876   | 103807346 | 103807405 | 0  | 25 |
| chr12 | A_53_P166953   | 103807850 | 103807909 | 0  | 25 |
| chr13 | A_67_P07800274 | 18792185  | 18792244  | 0  | 50 |
| chr13 | A_67_P07810826 | 23885875  | 23885934  | 0  | 25 |
| chr13 | A_53_P154257   | 23895497  | 23895556  | 0  | 25 |
| chr13 | A_53_P154257   | 23895497  | 23895556  | 0  | 25 |
| chr13 | A_53_P154257   | 23895497  | 23895556  | 0  | 25 |
| chr13 | A_53_P173873   | 23902797  | 23902856  | 0  | 25 |
| chr13 | A_67_P07818090 | 27155183  | 27155242  | 25 | 0  |
| chr13 | A_67_P07818169 | 27210860  | 27210919  | 25 | 0  |
| chr13 | A_53_P170219   | 101714168 | 101714227 | 0  | 25 |
| chr13 | A_53_P178026   | 101842739 | 101842798 | 25 | 0  |
| chr13 | A_53_P120963   | 105288825 | 105288884 | 0  | 25 |
| chr13 | A_53_P146207   | 105295215 | 105295274 | 0  | 25 |
| chr13 | A_53_P168106   | 105299626 | 105299685 | 0  | 25 |
| chr13 | A_53_P163495   | 106134302 | 106134361 | 0  | 25 |
| chr13 | A_53_P163495   | 106134302 | 106134361 | 0  | 25 |
| chr13 | A_53_P163495   | 106134302 | 106134361 | 0  | 25 |
| chr14 | A_67_P08046141 | 19320156  | 19320215  | 25 | 0  |
| chr14 | A_67_P02806702 | 19808158  | 19808216  | 0  | 25 |
| chr14 | A_53_P164346   | 46302419  | 46302478  | 0  | 25 |
| chr14 | A_53_P150330   | 46316577  | 46316636  | 0  | 25 |
| chr14 | A_67_P09541093 | 51406262  | 51406321  | 25 | 0  |
| chr14 | A_67_P09541099 | 51409109  | 51409168  | 25 | 0  |
| chr14 | A_53_P139209   | 51411970  | 51412025  | 25 | 0  |
| chr14 | A_67_P09541122 | 51417164  | 51417223  | 25 | 0  |
| chr14 | A_67_P08122673 | 56086711  | 56086770  | 25 | 0  |
| chr14 | A_67_P02856200 | 56097748  | 56097807  | 25 | 0  |
| chr14 | A_53_P164866   | 74062544  | 74062603  | 25 | 0  |
| chr14 | A_53_P151273   | 74065315  | 74065374  | 25 | 0  |
| chr14 | A_67_P02887043 | 74086065  | 74086124  | 25 | 0  |
| chr14 | A_67_P08202280 | 92835033  | 92835092  | 25 | 0  |
| chr14 | A_67_P08202299 | 92845694  | 92845753  | 25 | 0  |
| chr14 | A_67_P08202312 | 92850513  | 92850572  | 25 | 0  |
| chr14 | A_67_P08202326 | 92855795  | 92855854  | 25 | 0  |
| chr14 | A_67_P08209779 | 96821274  | 96821333  | 0  | 25 |
| chr14 | A_53_P115306   | 96836786  | 96836845  | 0  | 25 |
| chr14 | A_53_P115306   | 96836786  | 96836845  | 0  | 25 |
| chr14 | A_53_P115306   | 96836786  | 96836845  | 0  | 25 |
| chr14 | A_53_P145693   | 96836966  | 96837025  | 0  | 25 |
| chr14 | A_53_P145898   | 96837174  | 96837233  | 0  | 25 |
| chr14 | A_67_P08209849 | 96850408  | 96850467  | 0  | 25 |
| chr15 | A_67_P08315264 | 26758170  | 26758229  | 25 | 0  |
| chr15 | A_67_P08341576 | 38867642  | 38867701  | 0  | 25 |
| chr15 | A_67_P08341576 | 38867642  | 38867701  | 0  | 25 |
| chr15 | A_67_P08341576 | 38867642  | 38867701  | 0  | 25 |
| chr15 | A_67_P08394141 | 63940802  | 63940861  | 25 | 0  |
| chr15 | A_53_P166918   | 88970933  | 88970988  | 25 | 0  |
| chr15 | A_53_P171948   | 88975221  | 88975280  | 25 | 0  |
| chr15 | A_53_P126649   | 88976584  | 88976635  | 25 | 0  |
| chr15 | A_53_P127105   | 88983305  | 88983364  | 25 | 0  |
| chr15 | A_53_P136286   | 88995066  | 88995122  | 25 | 0  |
| chr15 | A_53_P173334   | 98421490  | 98421546  | 25 | 0  |
| chr16 | A_67_P03139062 | 16574551  | 16574610  | 25 | 0  |
| chr16 | A_53_P139354   | 32162433  | 32162492  | 25 | 0  |
| chr16 | A_53_P130295   | 32170718  | 32170777  | 25 | 0  |
| chr16 | A_67_P08554044 | 32179183  | 32179242  | 25 | 0  |
| chr16 | A_53_P108271   | 33690130  | 33690189  | 25 | 0  |
| chr16 | A_53_P108271   | 33690130  | 33690189  | 25 | 0  |
| chr16 | A_53_P108271   | 33690130  | 33690189  | 25 | 0  |
| chr16 | A_67_P08557914 | 33708617  | 33708676  | 25 | 0  |
| chr17 | A_53_P133081   | 25809378  | 25809437  | 25 | 0  |
| chr17 | A_53_P150583   | 27895538  | 27895594  | 0  | 25 |
| chr17 | A_53_P152162   | 27902578  | 27902637  | 0  | 25 |
| chr17 | A_53_P171490   | 27905939  | 27905998  | 0  | 25 |
| chr17 | A_53_P115225   | 34684977  | 34685024  | 25 | 0  |
| chr17 | A_53_P106959   | 34685847  | 34685892  | 25 | 0  |
| chr17 | A_53_P138468   | 34686683  | 34686735  | 25 | 0  |
| chr17 | A_53_P137281   | 34702345  | 34702391  | 25 | 0  |
| chr17 | A_53_P116826   | 36585761  | 36585820  | 0  | 25 |
| chr17 | A_53_P115438   | 36594311  | 36594370  | 0  | 25 |
| chr17 | A_53_P158116   | 46124596  | 46124642  | 25 | 0  |
| chr17 | A_53_P173922   | 52980852  | 52980911  | 0  | 25 |
| chr17 | A_53_P116883   | 52989730  | 52989789  | 0  | 25 |
| chr17 | A_53_P116883   | 52989730  | 52989789  | 0  | 25 |
| chr17 | A_53_P116883   | 52989730  | 52989789  | 0  | 25 |
| chr17 | A_53_P152639   | 53000512  | 53000571  | 0  | 25 |
| chr17 | A_53_P152639   | 53000512  | 53000571  | 0  | 25 |
| chr17 | A_53_P152639   | 53000512  | 53000571  | 0  | 25 |
| chr17 | A_53_P118521   | 53007268  | 53007327  | 0  | 25 |
| chr17 | A_67_P08810155 | 55605452  | 55605511  | 25 | 0  |

|       |                |           |           |    |    |
|-------|----------------|-----------|-----------|----|----|
| chr17 | A_53_P130606   | 55696986  | 55697035  | 25 | 0  |
| chr17 | A_53_P113362   | 74209351  | 74209410  | 25 | 0  |
| chr18 | A_67_P03431087 | 24557959  | 24558018  | 25 | 0  |
| chr18 | A_67_P08981643 | 43426689  | 43426748  | 25 | 0  |
| chr18 | A_53_P133748   | 43440380  | 43440439  | 25 | 0  |
| chr18 | A_67_P08982703 | 43844696  | 43844755  | 25 | 0  |
| chr18 | A_53_P104760   | 43854543  | 43854602  | 25 | 0  |
| chr18 | A_53_P131268   | 43859666  | 43859725  | 25 | 0  |
| chr18 | A_53_P131268   | 43859666  | 43859725  | 25 | 0  |
| chr18 | A_53_P131268   | 43859666  | 43859725  | 25 | 0  |
| chr18 | A_53_P147446   | 43861060  | 43861119  | 25 | 0  |
| chr18 | A_67_P08982782 | 43876946  | 43877005  | 25 | 0  |
| chr18 | A_53_P113407   | 43892688  | 43892747  | 25 | 0  |
| chr18 | A_67_P08989484 | 47030213  | 47030272  | 25 | 0  |
| chr18 | A_67_P03476429 | 52727853  | 52727912  | 25 | 0  |
| chr18 | A_53_P146645   | 52741567  | 52741626  | 25 | 0  |
| chr18 | A_53_P147369   | 52745782  | 52745841  | 25 | 0  |
| chr18 | A_53_P117213   | 53540243  | 53540302  | 25 | 0  |
| chr18 | A_67_P09003475 | 53550724  | 53550780  | 25 | 0  |
| chr18 | A_67_P09003505 | 53562019  | 53562078  | 25 | 0  |
| chr18 | A_67_P09003505 | 53562019  | 53562078  | 25 | 0  |
| chr18 | A_67_P09003505 | 53562019  | 53562078  | 25 | 0  |
| chr18 | A_53_P118567   | 53577601  | 53577660  | 25 | 0  |
| chr18 | A_67_P09040679 | 69301554  | 69301613  | 25 | 0  |
| chr18 | A_53_P153176   | 69321992  | 69322048  | 25 | 0  |
| chr18 | A_53_P136300   | 69324270  | 69324314  | 50 | 0  |
| chr18 | A_53_P136300   | 69324270  | 69324314  | 50 | 0  |
| chr18 | A_53_P136300   | 69324270  | 69324314  | 50 | 0  |
| chr18 | A_53_P135024   | 69324293  | 69324352  | 50 | 0  |
| chr18 | A_53_P108782   | 69324323  | 69324378  | 50 | 0  |
| chr18 | A_53_P165013   | 69325674  | 69325733  | 50 | 0  |
| chr18 | A_67_P09040796 | 69347825  | 69347884  | 50 | 0  |
| chr18 | A_67_P09045731 | 71525194  | 71525253  | 25 | 0  |
| chr18 | A_53_P175080   | 71542028  | 71542087  | 25 | 0  |
| chr18 | A_53_P157166   | 71543199  | 71543258  | 25 | 0  |
| chr19 | A_53_P110968   | 5366093   | 5366140   | 25 | 0  |
| chr19 | A_67_P09100045 | 8640093   | 8640152   | 50 | 0  |
| chr19 | A_53_P178543   | 12528984  | 12529040  | 25 | 0  |
| chr19 | A_53_P170355   | 23991393  | 23991452  | 0  | 25 |
| chr19 | A_53_P137572   | 32858532  | 32858591  | 0  | 25 |
| chr19 | A_53_P137572   | 32858532  | 32858591  | 0  | 25 |
| chr19 | A_53_P137572   | 32858532  | 32858591  | 0  | 25 |
| chr19 | A_53_P165169   | 42655157  | 42655216  | 25 | 0  |
| chr19 | A_53_P154274   | 42658537  | 42658586  | 25 | 0  |
| chr19 | A_67_P09176752 | 42671023  | 42671082  | 25 | 0  |
| chr19 | A_67_P03601847 | 43700489  | 43700548  | 25 | 0  |
| chrX  | A_53_P148429   | 6761992   | 6762051   | 25 | 0  |
| chrX  | A_53_P121696   | 6771589   | 6771648   | 25 | 0  |
| chrX  | A_53_P133445   | 52942175  | 52942234  | 25 | 0  |
| chrX  | A_53_P111467   | 57434621  | 57434680  | 25 | 0  |
| chrX  | A_53_P167072   | 70450454  | 70450513  | 25 | 0  |
| chrX  | A_53_P149742   | 70459045  | 70459104  | 25 | 0  |
| chrX  | A_53_P149742   | 70459045  | 70459104  | 25 | 0  |
| chrX  | A_53_P149742   | 70459045  | 70459104  | 25 | 0  |
| chrX  | A_53_P134109   | 71665920  | 71665979  | 25 | 0  |
| chrX  | A_53_P122398   | 71671541  | 71671600  | 25 | 0  |
| chrX  | A_53_P172749   | 71690706  | 71690765  | 25 | 0  |
| chrX  | A_53_P160488   | 97934778  | 97934826  | 25 | 0  |
| chrX  | A_53_P126106   | 97935706  | 97935751  | 25 | 0  |
| chrX  | A_67_P09376608 | 97949869  | 97949928  | 25 | 0  |
| chrX  | A_67_P09434157 | 133885375 | 133885434 | 25 | 0  |
| chrX  | A_67_P09434207 | 133910324 | 133910383 | 25 | 0  |
| chrX  | A_67_P09465815 | 150587326 | 150587385 | 0  | 25 |
| chrX  | A_53_P151451   | 150606521 | 150606580 | 0  | 25 |
| chrX  | A_53_P159083   | 150608400 | 150608459 | 0  | 25 |
| chrX  | A_53_P159083   | 150608400 | 150608459 | 0  | 25 |
| chrX  | A_53_P159083   | 150608400 | 150608459 | 0  | 25 |
| chrX  | A_67_P09465901 | 150620880 | 150620939 | 0  | 25 |
| chrY  | A_67_P09495664 | 32258     | 32317     | 0  | 25 |
| chrY  | A_67_P09495665 | 37029     | 37088     | 0  | 25 |
| chrY  | A_67_P09495666 | 37653     | 37712     | 0  | 25 |
| chrY  | A_67_P09495672 | 47507     | 47560     | 0  | 25 |
| chrY  | A_67_P09495676 | 49697     | 49756     | 0  | 25 |
| chrY  | A_67_P09495677 | 56946     | 57005     | 0  | 25 |
| chrY  | A_67_P09495679 | 57466     | 57525     | 0  | 25 |
| chrY  | A_67_P09495681 | 58972     | 59027     | 0  | 25 |
| chrY  | A_67_P09495683 | 59668     | 59727     | 0  | 25 |
| chrY  | A_67_P09495685 | 60221     | 60280     | 0  | 25 |
| chrY  | A_67_P09495687 | 60984     | 61043     | 0  | 25 |
| chrY  | A_67_P09495688 | 61333     | 61392     | 0  | 25 |
| chrY  | A_67_P09495689 | 61790     | 61849     | 0  | 25 |
| chrY  | A_67_P09495692 | 62775     | 62834     | 0  | 25 |
| chrY  | A_67_P09495695 | 63474     | 63533     | 0  | 25 |
| chrY  | A_67_P09495696 | 63878     | 63937     | 0  | 25 |
| chrY  | A_67_P09495698 | 64309     | 64368     | 0  | 25 |
| chrY  | A_67_P09495702 | 66346     | 66405     | 0  | 25 |
| chrY  | A_67_P09496642 | 623572    | 623631    | 0  | 25 |
| chrY  | A_67_P09496643 | 623885    | 623944    | 0  | 25 |
| chrY  | A_67_P09496644 | 627345    | 627404    | 0  | 50 |
| chrY  | A_67_P09496646 | 628070    | 628121    | 0  | 75 |
| chrY  | A_67_P09496649 | 628670    | 628729    | 0  | 75 |
| chrY  | A_67_P09496652 | 629548    | 629607    | 0  | 75 |

|      |                |        |        |   |    |
|------|----------------|--------|--------|---|----|
| chrY | A_67_P09496654 | 630269 | 630328 | 0 | 75 |
| chrY | A_67_P09496657 | 631098 | 631157 | 0 | 75 |
| chrY | A_67_P09496658 | 631698 | 631757 | 0 | 75 |
| chrY | A_67_P09496659 | 631964 | 632023 | 0 | 75 |
| chrY | A_67_P09496660 | 632329 | 632388 | 0 | 75 |
| chrY | A_67_P09496661 | 632616 | 632675 | 0 | 75 |
| chrY | A_67_P09496665 | 634102 | 634161 | 0 | 75 |
| chrY | A_67_P09496668 | 635448 | 635507 | 0 | 75 |
| chrY | A_67_P09496670 | 635897 | 635956 | 0 | 50 |
| chrY | A_67_P09496672 | 636208 | 636267 | 0 | 50 |
| chrY | A_67_P09496673 | 637137 | 637196 | 0 | 50 |
| chrY | A_67_P09496674 | 637413 | 637471 | 0 | 50 |
| chrY | A_67_P09496676 | 638747 | 638806 | 0 | 50 |
| chrY | A_67_P09496678 | 639320 | 639379 | 0 | 50 |
| chrY | A_67_P09496679 | 639815 | 639874 | 0 | 75 |
| chrY | A_67_P09496682 | 640215 | 640274 | 0 | 75 |
| chrY | A_67_P09496683 | 640588 | 640647 | 0 | 75 |
| chrY | A_67_P09496685 | 641014 | 641073 | 0 | 75 |
| chrY | A_67_P09496688 | 641515 | 641574 | 0 | 75 |
| chrY | A_67_P09496690 | 641899 | 641958 | 0 | 75 |
| chrY | A_67_P09496691 | 642598 | 642657 | 0 | 50 |
| chrY | A_67_P09496693 | 642954 | 643013 | 0 | 50 |
| chrY | A_67_P09496694 | 643417 | 643476 | 0 | 75 |
| chrY | A_67_P09496695 | 643727 | 643786 | 0 | 75 |
| chrY | A_67_P09496696 | 644057 | 644116 | 0 | 75 |
| chrY | A_67_P09496700 | 644615 | 644674 | 0 | 75 |
| chrY | A_67_P09496703 | 645418 | 645467 | 0 | 75 |
| chrY | A_67_P09496704 | 646853 | 646912 | 0 | 50 |
| chrY | A_67_P09496706 | 647133 | 647192 | 0 | 50 |
| chrY | A_67_P09496707 | 647494 | 647553 | 0 | 50 |
| chrY | A_67_P09496708 | 647770 | 647829 | 0 | 75 |
| chrY | A_67_P09496709 | 648169 | 648228 | 0 | 75 |
| chrY | A_67_P09496711 | 649317 | 649376 | 0 | 50 |
| chrY | A_67_P09496714 | 650222 | 650281 | 0 | 75 |
| chrY | A_67_P09496716 | 650704 | 650763 | 0 | 75 |
| chrY | A_67_P09496719 | 651036 | 651095 | 0 | 75 |
| chrY | A_67_P09496720 | 651315 | 651374 | 0 | 75 |
| chrY | A_67_P09496721 | 651654 | 651713 | 0 | 75 |
| chrY | A_67_P09496722 | 652080 | 652139 | 0 | 75 |
| chrY | A_67_P09496724 | 652377 | 652436 | 0 | 75 |
| chrY | A_67_P09496725 | 652730 | 652789 | 0 | 75 |
| chrY | A_67_P09496726 | 653014 | 653070 | 0 | 75 |
| chrY | A_67_P09496728 | 653581 | 653640 | 0 | 75 |
| chrY | A_67_P09496729 | 653867 | 653926 | 0 | 75 |
| chrY | A_67_P09496730 | 654154 | 654213 | 0 | 75 |
| chrY | A_67_P09496731 | 654557 | 654616 | 0 | 75 |
| chrY | A_67_P09496732 | 654904 | 654963 | 0 | 75 |
| chrY | A_67_P09496733 | 655465 | 655524 | 0 | 75 |
| chrY | A_67_P09496738 | 660856 | 660915 | 0 | 75 |
| chrY | A_67_P09496739 | 661121 | 661180 | 0 | 75 |
| chrY | A_67_P09496741 | 661473 | 661532 | 0 | 75 |
| chrY | A_67_P09496742 | 662598 | 662657 | 0 | 75 |
| chrY | A_67_P09496743 | 663678 | 663737 | 0 | 75 |
| chrY | A_67_P09496744 | 664623 | 664682 | 0 | 75 |
| chrY | A_67_P09496746 | 665310 | 665369 | 0 | 75 |
| chrY | A_67_P09496747 | 666541 | 666600 | 0 | 75 |
| chrY | A_67_P09496750 | 667350 | 667409 | 0 | 75 |
| chrY | A_67_P09496752 | 667986 | 668045 | 0 | 75 |
| chrY | A_67_P09496753 | 668539 | 668598 | 0 | 75 |
| chrY | A_67_P09496755 | 669104 | 669163 | 0 | 75 |
| chrY | A_67_P09496756 | 669418 | 669477 | 0 | 75 |
| chrY | A_67_P09496757 | 670009 | 670068 | 0 | 75 |
| chrY | A_67_P09496760 | 670297 | 670356 | 0 | 75 |
| chrY | A_67_P09496761 | 670772 | 670831 | 0 | 75 |
| chrY | A_67_P09496763 | 671329 | 671388 | 0 | 75 |
| chrY | A_67_P09496764 | 671623 | 671682 | 0 | 75 |
| chrY | A_67_P09496765 | 672167 | 672226 | 0 | 75 |
| chrY | A_67_P09496768 | 672730 | 672789 | 0 | 75 |
| chrY | A_67_P09496770 | 673484 | 673543 | 0 | 75 |
| chrY | A_67_P09496771 | 674648 | 674707 | 0 | 75 |
| chrY | A_67_P09496772 | 675552 | 675611 | 0 | 50 |
| chrY | A_67_P09496773 | 676399 | 676458 | 0 | 50 |
| chrY | A_67_P09496777 | 677292 | 677351 | 0 | 50 |
| chrY | A_67_P09496779 | 677920 | 677979 | 0 | 50 |
| chrY | A_67_P09496780 | 678180 | 678239 | 0 | 50 |
| chrY | A_67_P09496783 | 679819 | 679878 | 0 | 25 |
| chrY | A_67_P09496784 | 680224 | 680283 | 0 | 25 |
| chrY | A_67_P09496785 | 680741 | 680800 | 0 | 50 |
| chrY | A_67_P09496788 | 681659 | 681718 | 0 | 50 |
| chrY | A_67_P09496792 | 687024 | 687083 | 0 | 50 |
| chrY | A_67_P09496793 | 687335 | 687394 | 0 | 50 |
| chrY | A_67_P09496795 | 687961 | 688020 | 0 | 50 |
| chrY | A_67_P09496796 | 688281 | 688340 | 0 | 50 |
| chrY | A_67_P09496799 | 688605 | 688664 | 0 | 50 |
| chrY | A_67_P09496800 | 689126 | 689185 | 0 | 50 |
| chrY | A_67_P09496803 | 690353 | 690412 | 0 | 50 |
| chrY | A_67_P09496804 | 690811 | 690870 | 0 | 50 |
| chrY | A_67_P09496805 | 691106 | 691165 | 0 | 50 |
| chrY | A_67_P09496806 | 691676 | 691735 | 0 | 75 |
| chrY | A_67_P09496808 | 692380 | 692439 | 0 | 50 |
| chrY | A_67_P09496811 | 692699 | 692758 | 0 | 50 |
| chrY | A_67_P09496813 | 693327 | 693386 | 0 | 50 |

|      |                |        |        |   |     |
|------|----------------|--------|--------|---|-----|
| chrY | A_67_P09496814 | 693733 | 693792 | 0 | 50  |
| chrY | A_67_P09496815 | 697057 | 697116 | 0 | 75  |
| chrY | A_67_P09496816 | 697432 | 697491 | 0 | 75  |
| chrY | A_67_P09496817 | 699473 | 699517 | 0 | 75  |
| chrY | A_67_P09496819 | 699765 | 699813 | 0 | 75  |
| chrY | A_67_P09496821 | 701032 | 701091 | 0 | 75  |
| chrY | A_67_P09496825 | 701902 | 701961 | 0 | 50  |
| chrY | A_67_P09496827 | 702769 | 702828 | 0 | 50  |
| chrY | A_67_P09496828 | 703225 | 703284 | 0 | 50  |
| chrY | A_67_P09496830 | 703517 | 703575 | 0 | 50  |
| chrY | A_67_P09496832 | 703962 | 704021 | 0 | 50  |
| chrY | A_67_P09496833 | 704396 | 704455 | 0 | 50  |
| chrY | A_67_P09496836 | 704729 | 704788 | 0 | 50  |
| chrY | A_67_P09496837 | 705004 | 705058 | 0 | 50  |
| chrY | A_67_P09496838 | 705993 | 706052 | 0 | 75  |
| chrY | A_67_P09496840 | 717240 | 717299 | 0 | 50  |
| chrY | A_67_P09496841 | 717601 | 717660 | 0 | 50  |
| chrY | A_67_P09496844 | 718293 | 718352 | 0 | 50  |
| chrY | A_67_P09496845 | 719247 | 719306 | 0 | 50  |
| chrY | A_67_P09496847 | 719921 | 719980 | 0 | 50  |
| chrY | A_67_P09496849 | 720549 | 720608 | 0 | 50  |
| chrY | A_67_P09496854 | 721204 | 721263 | 0 | 50  |
| chrY | A_67_P09496855 | 721660 | 721719 | 0 | 50  |
| chrY | A_67_P09496885 | 723246 | 723305 | 0 | 100 |
| chrY | A_67_P09496884 | 723606 | 723665 | 0 | 75  |
| chrY | A_67_P09496882 | 724214 | 724273 | 0 | 75  |
| chrY | A_67_P09496881 | 726601 | 726660 | 0 | 50  |
| chrY | A_67_P09496880 | 727217 | 727276 | 0 | 50  |
| chrY | A_67_P09496876 | 728034 | 728093 | 0 | 50  |
| chrY | A_67_P09496875 | 728490 | 728549 | 0 | 50  |
| chrY | A_67_P09496874 | 728876 | 728935 | 0 | 50  |
| chrY | A_67_P09496873 | 729306 | 729365 | 0 | 50  |
| chrY | A_67_P09496871 | 729900 | 729959 | 0 | 25  |
| chrY | A_67_P09496870 | 730285 | 730344 | 0 | 50  |
| chrY | A_67_P09496869 | 730810 | 730869 | 0 | 50  |
| chrY | A_67_P09496868 | 731246 | 731305 | 0 | 25  |
| chrY | A_67_P09496867 | 731532 | 731591 | 0 | 25  |
| chrY | A_67_P09496867 | 731532 | 731591 | 0 | 25  |
| chrY | A_67_P09496866 | 731856 | 731915 | 0 | 25  |
| chrY | A_67_P09496864 | 732462 | 732521 | 0 | 25  |
| chrY | A_67_P09496862 | 733114 | 733173 | 0 | 25  |
| chrY | A_67_P09496861 | 733675 | 733734 | 0 | 25  |
| chrY | A_67_P09496888 | 743324 | 743383 | 0 | 50  |
| chrY | A_67_P09496891 | 746327 | 746386 | 0 | 50  |
| chrY | A_67_P09496892 | 746894 | 746953 | 0 | 50  |
| chrY | A_67_P09496893 | 747278 | 747337 | 0 | 50  |
| chrY | A_67_P09496895 | 747897 | 747956 | 0 | 50  |
| chrY | A_67_P09496896 | 748399 | 748458 | 0 | 75  |
| chrY | A_67_P09496897 | 748820 | 748879 | 0 | 75  |
| chrY | A_67_P09496901 | 764310 | 764369 | 0 | 50  |
| chrY | A_67_P09496902 | 764658 | 764717 | 0 | 50  |
| chrY | A_67_P09496905 | 765433 | 765484 | 0 | 75  |
| chrY | A_67_P09496906 | 765932 | 765991 | 0 | 75  |
| chrY | A_67_P09496909 | 767056 | 767115 | 0 | 50  |
| chrY | A_67_P09496910 | 767919 | 767978 | 0 | 100 |
| chrY | A_67_P09496911 | 768258 | 768317 | 0 | 100 |
| chrY | A_67_P09496913 | 768750 | 768809 | 0 | 100 |
| chrY | A_67_P09496915 | 769887 | 769946 | 0 | 100 |
| chrY | A_67_P09496916 | 770276 | 770335 | 0 | 100 |
| chrY | A_67_P09496917 | 770560 | 770619 | 0 | 100 |
| chrY | A_67_P09496918 | 770840 | 770899 | 0 | 100 |
| chrY | A_67_P09496921 | 771509 | 771568 | 0 | 50  |
| chrY | A_67_P09496922 | 771811 | 771870 | 0 | 100 |
| chrY | A_67_P09496924 | 774972 | 775031 | 0 | 50  |
| chrY | A_67_P09496925 | 775407 | 775466 | 0 | 50  |
| chrY | A_67_P09496926 | 775742 | 775801 | 0 | 75  |
| chrY | A_67_P09496928 | 776520 | 776579 | 0 | 50  |
| chrY | A_67_P09496929 | 776898 | 776957 | 0 | 75  |
| chrY | A_67_P09496930 | 777197 | 777256 | 0 | 75  |
| chrY | A_67_P09496931 | 777594 | 777653 | 0 | 75  |
| chrY | A_67_P09496932 | 777990 | 778049 | 0 | 75  |
| chrY | A_67_P09496933 | 778485 | 778544 | 0 | 75  |
| chrY | A_67_P09496935 | 779015 | 779074 | 0 | 75  |
| chrY | A_67_P09496937 | 779518 | 779577 | 0 | 75  |
| chrY | A_67_P09496938 | 780071 | 780130 | 0 | 75  |
| chrY | A_67_P09496942 | 780989 | 781048 | 0 | 75  |
| chrY | A_67_P09496943 | 781759 | 781818 | 0 | 75  |
| chrY | A_67_P09496944 | 782048 | 782107 | 0 | 75  |
| chrY | A_67_P09496946 | 782652 | 782711 | 0 | 75  |
| chrY | A_67_P09496947 | 783230 | 783289 | 0 | 75  |
| chrY | A_67_P09496949 | 783584 | 783643 | 0 | 75  |
| chrY | A_67_P09496950 | 784163 | 784222 | 0 | 75  |
| chrY | A_67_P09496950 | 784163 | 784222 | 0 | 75  |
| chrY | A_67_P09496950 | 784163 | 784222 | 0 | 75  |
| chrY | A_67_P09496951 | 784675 | 784734 | 0 | 75  |
| chrY | A_67_P09496954 | 785451 | 785510 | 0 | 75  |
| chrY | A_67_P09496955 | 786004 | 786063 | 0 | 75  |
| chrY | A_67_P09496956 | 786266 | 786325 | 0 | 75  |
| chrY | A_67_P09496957 | 786751 | 786810 | 0 | 75  |
| chrY | A_67_P09496958 | 787301 | 787360 | 0 | 75  |
| chrY | A_67_P09496959 | 787604 | 787663 | 0 | 75  |

|      |                |         |         |   |    |
|------|----------------|---------|---------|---|----|
| chrY | A_67_P09496960 | 788271  | 788330  | 0 | 75 |
| chrY | A_67_P09496961 | 788604  | 788663  | 0 | 75 |
| chrY | A_67_P09496962 | 788991  | 789050  | 0 | 75 |
| chrY | A_67_P09496964 | 790418  | 790477  | 0 | 50 |
| chrY | A_67_P09496965 | 790754  | 790813  | 0 | 75 |
| chrY | A_67_P09496967 | 791059  | 791118  | 0 | 50 |
| chrY | A_67_P09496969 | 791570  | 791629  | 0 | 50 |
| chrY | A_67_P09496970 | 792056  | 792115  | 0 | 50 |
| chrY | A_67_P09496971 | 792392  | 792451  | 0 | 50 |
| chrY | A_67_P09496972 | 793534  | 793593  | 0 | 75 |
| chrY | A_67_P09496974 | 794678  | 794737  | 0 | 75 |
| chrY | A_67_P09496976 | 795254  | 795313  | 0 | 50 |
| chrY | A_67_P09496977 | 795793  | 795845  | 0 | 50 |
| chrY | A_67_P09496979 | 796130  | 796189  | 0 | 50 |
| chrY | A_67_P09496981 | 796753  | 796812  | 0 | 50 |
| chrY | A_67_P09496982 | 798108  | 798167  | 0 | 50 |
| chrY | A_67_P09496983 | 798920  | 798974  | 0 | 50 |
| chrY | A_67_P09496984 | 799215  | 799274  | 0 | 50 |
| chrY | A_67_P09496985 | 799656  | 799715  | 0 | 50 |
| chrY | A_67_P09496987 | 800431  | 800490  | 0 | 50 |
| chrY | A_67_P09496988 | 800792  | 800851  | 0 | 50 |
| chrY | A_67_P09496989 | 801169  | 801228  | 0 | 50 |
| chrY | A_67_P09496990 | 801874  | 801933  | 0 | 50 |
| chrY | A_67_P09497449 | 1602758 | 1602817 | 0 | 25 |
| chrY | A_67_P09497453 | 1604555 | 1604614 | 0 | 25 |
| chrY | A_67_P09497459 | 1607051 | 1607110 | 0 | 25 |
| chrY | A_67_P09497467 | 1609749 | 1609800 | 0 | 25 |
| chrY | A_67_P09497471 | 1611237 | 1611288 | 0 | 25 |
| chrY | A_67_P09497483 | 1620306 | 1620365 | 0 | 25 |
| chrY | A_67_P09497492 | 1623398 | 1623449 | 0 | 25 |
| chrY | A_67_P09497497 | 1625424 | 1625483 | 0 | 25 |
| chrY | A_67_P09497502 | 1627320 | 1627379 | 0 | 25 |
| chrY | A_67_P09497528 | 1641299 | 1641358 | 0 | 25 |
| chrY | A_67_P09497556 | 1667176 | 1667235 | 0 | 25 |
| chrY | A_67_P09497564 | 1669747 | 1669806 | 0 | 25 |
| chrY | A_67_P09497565 | 1670249 | 1670308 | 0 | 25 |
| chrY | A_67_P09497570 | 1671998 | 1672057 | 0 | 25 |
| chrY | A_67_P09497573 | 1672749 | 1672808 | 0 | 25 |
| chrY | A_67_P09497582 | 1677061 | 1677120 | 0 | 25 |
| chrY | A_67_P09497601 | 1684098 | 1684157 | 0 | 25 |
| chrY | A_67_P09497603 | 1684861 | 1684920 | 0 | 25 |
| chrY | A_67_P09497606 | 1685953 | 1686012 | 0 | 25 |
| chrY | A_67_P09497612 | 1699586 | 1699645 | 0 | 50 |
| chrY | A_67_P09497615 | 1700636 | 1700695 | 0 | 50 |
| chrY | A_67_P09497618 | 1702869 | 1702923 | 0 | 25 |
| chrY | A_67_P09497620 | 1703624 | 1703673 | 0 | 50 |
| chrY | A_67_P09497630 | 1708607 | 1708666 | 0 | 25 |
| chrY | A_67_P09497631 | 1709117 | 1709167 | 0 | 25 |
| chrY | A_67_P09497633 | 1709788 | 1709847 | 0 | 25 |
| chrY | A_67_P09497635 | 1710446 | 1710498 | 0 | 25 |
| chrY | A_67_P09497637 | 1711122 | 1711181 | 0 | 25 |
| chrY | A_67_P09497643 | 1712381 | 1712435 | 0 | 25 |
| chrY | A_67_P09497645 | 1712871 | 1712930 | 0 | 25 |
| chrY | A_67_P09497647 | 1713604 | 1713661 | 0 | 25 |
| chrY | A_67_P09497649 | 1714487 | 1714546 | 0 | 25 |
| chrY | A_67_P09497671 | 1731943 | 1732001 | 0 | 25 |
| chrY | A_67_P09497710 | 1756587 | 1756646 | 0 | 25 |
| chrY | A_67_P09497721 | 1772303 | 1772362 | 0 | 25 |
| chrY | A_67_P09497749 | 1788059 | 1788107 | 0 | 25 |
| chrY | A_67_P09497751 | 1788886 | 1788945 | 0 | 25 |
| chrY | A_67_P09497753 | 1789482 | 1789541 | 0 | 25 |
| chrY | A_67_P09497762 | 1798851 | 1798910 | 0 | 50 |
| chrY | A_67_P09497766 | 1800150 | 1800206 | 0 | 50 |
| chrY | A_67_P09497768 | 1806959 | 1807018 | 0 | 25 |
| chrY | A_67_P09497777 | 1813416 | 1813475 | 0 | 25 |
| chrY | A_67_P09497778 | 1813881 | 1813940 | 0 | 25 |
| chrY | A_67_P09497805 | 1823971 | 1824026 | 0 | 50 |
| chrY | A_67_P09497818 | 1830151 | 1830210 | 0 | 50 |
| chrY | A_67_P09497819 | 1830633 | 1830692 | 0 | 50 |
| chrY | A_67_P09497821 | 1832953 | 1833012 | 0 | 50 |
| chrY | A_67_P09497822 | 1834587 | 1834646 | 0 | 50 |
| chrY | A_67_P09497824 | 1835307 | 1835366 | 0 | 50 |

The locations of copy number gain or loss observed from tumors in the mouse genome and the genes present in those regions  
Deletion and amplification columns are percentage of tumors with a deletion or amplification.
