# Supplementary material for: Predisposition to Cancer Caused by Genetic and Functional Defects of Mammalian Atad5
Source: PubMed Central journal article supplement (PMC3161924; doi:10.1371/journal.pgen.1002245), 2011-08-25
Supplement: pgen.1002245.s006.pdf [file pgen.1002245.s006.pdf]

Table S2. List of cancer gene transcripts that had up or down regulated expression in two tumor samples compared to their normal controls

# Notes : Fold change >= 1.0

| ProbeName    | Fold change([TUMOR] vs [COI Regulation][TUMOR] vs [ | Common name | GeneSymbol | GenbankAccession | Description                                                                                                                                                                                                                                     |
|--------------|-----------------------------------------------------|-------------|------------|------------------|-------------------------------------------------------------------------------------------------------------------------------------------------------------------------------------------------------------------------------------------------|
| A_52_P340074 | 1.8099836 down                                      | AK152535    | Abcb7      | AK152535         | Mus musculus bone marrow macrophage cDNA, RIKEN full-length enriched library, clone:ib3007815 product:ATP-binding cassette, sub-family B (MDR/TAP), member 7, full insert sequence. [AK152535]                                                  |
| A_52_P360650 | 2.453843 down                                       | XM_007304   | Abcb7      | XM_007304        | PREDICTED: Mus musculus ATP-binding cassette, sub-family B (MDR/TAP), member 7, transcript variant 5 (Abcb7), mRNA [NM_007304]                                                                                                                  |
| A_52_P363556 | 4.2834387 up                                        | NM_198127   | Abi2       | NM_198127        | Mus musculus abi-interactor 2 (Abi2), mRNA [NM_198127]                                                                                                                                                                                          |
| A_52_P530042 | 4.517351 up                                         | NM_198127   | Abi2       | NM_198127        | Mus musculus abi-interactor 2 (Abi2), mRNA [NM_198127]                                                                                                                                                                                          |
| A_52_P141338 | 1.2804152 down                                      | NM_022819   | Acot10     | NM_022819        | Mus musculus acyl-CoA thioesterase 10 (Acot10), mRNA [NM_022819]                                                                                                                                                                                |
| A_52_P392674 | 1.1627663 down                                      | NM_019736   | Acot9      | NM_019736        | Mus musculus acyl-CoA thioesterase 9 (Acot9), mRNA [NM_019736]                                                                                                                                                                                  |
| A_52_P664656 | 1.7672709 down                                      | NM_007396   | Acrv2a     | NM_007396        | Mus musculus activin receptor IIA (Acrv2a), mRNA [NM_007396]                                                                                                                                                                                    |
| A_52_P575854 | 2.2381537 down                                      | NM_007396   | Acrv2a     | NM_007396        | Mus musculus activin receptor IIA (Acrv2a), mRNA [NM_007396]                                                                                                                                                                                    |
| A_51_P148290 | 4.214034 up                                         | NM_172875   | Adc        | NM_172875        | Mus musculus arginine decarboxylase (Adc), mRNA [NM_172875]                                                                                                                                                                                     |
| A_51_P428555 | 7.612395 down                                       | NM_007409   | Adh1       | NM_007409        | Mus musculus alcohol dehydrogenase 1 (class I) (Adh1), mRNA [NM_007409]                                                                                                                                                                         |
| A_52_P629895 | 7.6195116 down                                      | NM_007409   | Adh1       | NM_007409        | Mus musculus alcohol dehydrogenase 1 (class I) (Adh1), mRNA [NM_007409]                                                                                                                                                                         |
| A_51_P342567 | 6.9533815 up                                        | NM_031185   | Akap12     | NM_031185        | Mus musculus A kinase (PKA) anchor protein (gravin) 12 (Akap12), mRNA [NM_031185]                                                                                                                                                               |
| A_51_P359272 | 9.003699 down                                       | NM_009655   | Alcam      | NM_009655        | Mus musculus activated leukocyte cell adhesion molecule (Alcam), mRNA [NM_009655]                                                                                                                                                               |
| A_51_P429681 | 1.7780472 up                                        | AK033397    | Apbb2      | AK033397         | Mus musculus 16 days embryo lung cDNA, RIKEN full-length enriched library, clone:8430429117 product:unclassified, full insert sequence. [AK033397]                                                                                              |
| A_51_P149562 | 1.9322677 up                                        | NM_009686   | Apbb2      | NM_009686        | Mus musculus amyloid beta 1(A4) precursor protein-binding, family 8, member 2 (Apbb2), mRNA [NM_009686]                                                                                                                                         |
| A_52_P555603 | 3.4982803 up                                        | AK032770    | Apbb2      | AK032770         | Mus musculus 12 days embryo male wolffian duct includes surrounding region cDNA, RIKEN full-length enriched library, clone:6720431015 product:amyloid beta (A4) precursor protein-binding, family 8, member 2, full insert sequence. [AK032770] |
| A_51_P223946 | 1.6330367 up                                        | AK122414    | Aprin      | AK122414         | Mus musculus mRNA for mitogen-activated protein kinase [AK122414]                                                                                                                                                                               |
| A_52_P24783  | 2.1686547 up                                        | NM_175310   | Aprin      | NM_175310        | Mus musculus androgen-induced proliferation inhibitor (Aprin), mRNA [NM_175310]                                                                                                                                                                 |
| A_52_P617762 | 2.0554051 down                                      | AK039081    | Arhgap5    | AK039081         | Mus musculus adult male hypothalamus cDNA, RIKEN full-length enriched library, clone:A230093124 product:unclassified, full insert sequence. [AK039081]                                                                                          |
| A_52_P260864 | 2.4404852 down                                      | NM_009706   | Arhgap5    | NM_009706        | Mus musculus Rho GTPase activating protein 5 (Arhgap5), mRNA [NM_009706]                                                                                                                                                                        |
| A_52_P551909 | 2.6211565 down                                      | NM_009706   | Arhgap5    | NM_009706        | Mus musculus Rho GTPase activating protein 5 (Arhgap5), mRNA [NM_009706]                                                                                                                                                                        |
| A_51_P614762 | 1.5588276 down                                      | AK029400    | Bad        | AK029400         | Mus musculus 0 day neonate head cDNA, RIKEN full-length enriched library, clone:4833429M11 product:Bcl-associated death promoter, full insert sequence. [AK029400]                                                                              |
| A_51_P419364 | 2.6857738 down                                      | NM_007522   | Bad        | NM_007522        | Mus musculus Bcl-associated death promoter (Bad), mRNA [NM_007522]                                                                                                                                                                              |
| A_51_P106263 | 2.1901217 up                                        | NM_133926   | Camk1      | NM_133926        | Mus musculus calcium/calmodulin-dependent protein kinase 1 (Camk1), mRNA [NM_133926]                                                                                                                                                            |
| A_51_P106259 | 2.258415 up                                         | NM_133926   | Camk1      | NM_133926        | Mus musculus calcium/calmodulin-dependent protein kinase 1 (Camk1), mRNA [NM_133926]                                                                                                                                                            |
| A_51_P262766 | 3.800415 up                                         | S78355      | Cnd1       | S78355           | Cyt-1-cyclin D1 (mice, BALB/c, brain, mRNA, 3737 nt), [S78355]                                                                                                                                                                                  |
| A_51_P248666 | 3.0001664 up                                        | NM_021893   | Cd274      | NM_021893        | Mus musculus CD274 antigen (Cd274), mRNA [NM_021893]                                                                                                                                                                                            |
| A_51_P375146 | 2.9806201 down                                      | NM_007643   | Cd36       | NM_007643        | Mus musculus CD36 antigen (Cd36), mRNA [NM_007643]                                                                                                                                                                                              |
| A_51_P375138 | 3.2577126 down                                      | L23108      | Cd36       | L23108           | Mus musculus CD36 antigen mRNA, complete cds. [L23108]                                                                                                                                                                                          |
| A_52_P683146 | 1.129669 up                                         | NM_009866   | Cdh11      | NM_009866        | Mus musculus cadherin 11 (Cdh11), mRNA [NM_009866]                                                                                                                                                                                              |
| A_52_P437795 | 6.037858 up                                         | NM_009866   | Cdh11      | NM_009866        | Mus musculus cadherin 11 (Cdh11), mRNA [NM_009866]                                                                                                                                                                                              |
| A_51_P506204 | 7.4964786 up                                        | NM_009866   | Cdh11      | NM_009866        | Mus musculus cadherin 11 (Cdh11), mRNA [NM_009866]                                                                                                                                                                                              |
| A_51_P193563 | 1.2164589 down                                      | NM_009874   | Cdk7       | NM_009874        | Mus musculus cyclin-dependent kinase 7 (homolog of Xenopus MO15 cdk-activating kinase) (Cdk7), mRNA [NM_009874]                                                                                                                                 |
| A_52_P258991 | 2.0637655 down                                      | AK145759    | Cdk7       | AK145759         | Mus musculus blastocyst blastocyst cDNA, RIKEN full-length enriched library, clone:IC0038111 product:cyclin-dependent kinase 7 (homolog of Xenopus MO15 cdk-activating kinase), full insert sequence [AK145759]                                 |
| A_51_P513719 | 2.98359 up                                          | NM_007671   | Cdk2c      | NM_007671        | Mus musculus cyclin-dependent kinase 2C (p18, inhibits CDK4) (Cdk2c), mRNA [NM_007671]                                                                                                                                                          |
| A_51_P313720 | 3.0137582 up                                        | U15092c     | Cdk2c      | U15092c          | Mus musculus CDK4 and Cdk6 inhibitor protein mRNA, complete cds. [U15092c]                                                                                                                                                                      |
| A_51_P244663 | 2.4548311 up                                        | NM_020008   | Clec7a     | NM_020008        | Mus musculus C-type lectin domain family 7, member A (Clec7a), mRNA [NM_020008]                                                                                                                                                                 |
| A_52_P216436 | 1.6547683 down                                      | NM_031163   | Col2a1     | NM_031163        | Mus musculus procollagen, type II, alpha 1 (Col2a1), mRNA [NM_031163]                                                                                                                                                                           |
| A_51_P317141 | 6.2127233 up                                        | NM_031163   | Col2a1     | NM_031163        | Mus musculus procollagen, type II, alpha 1 (Col2a1), mRNA [NM_031163]                                                                                                                                                                           |
| A_51_P493234 | 12.867895 up                                        | NM_007752   | Cp         | NM_007752        | Mus musculus ceruloplasmin (Cp), transcript variant 2, mRNA [NM_007752]                                                                                                                                                                         |
| A_51_P111762 | 2.3400002 down                                      | NM_011804   | Creg1      | NM_011804        | Mus musculus cellular repressor of E1A-stimulated genes 1 (Creg1), mRNA [NM_011804]                                                                                                                                                             |
| A_52_P340789 | 2.454221 down                                       | NM_011804   | Creg1      | NM_011804        | Mus musculus cellular repressor of E1A-stimulated genes 1 (Creg1), mRNA [NM_011804]                                                                                                                                                             |
| A_52_P155708 | 3.8975482 down                                      | NM_011804   | Creg1      | NM_011804        | Mus musculus cellular repressor of E1A-stimulated genes 1 (Creg1), mRNA [NM_011804]                                                                                                                                                             |
| A_52_P542419 | 2.378108 up                                         | NM_013767   | Csnk1e     | NM_013767        | Mus musculus casein kinase 1, epsilon (Csnk1e), mRNA [NM_013767]                                                                                                                                                                                |
| A_51_P429197 | 2.4807916 up                                        | NM_013767   | Csnk1e     | NM_013767        | Mus musculus casein kinase 1, epsilon (Csnk1e), mRNA [NM_013767]                                                                                                                                                                                |
| A_51_P363187 | 23.046015 up                                        | NM_008176   | Cxcl1      | NM_008176        | Mus musculus chemokine (C-X-C motif) ligand 1 (Cxcl1), mRNA [NM_008176]                                                                                                                                                                         |
| A_51_P252859 | 8.381687 up                                         | NM_010516   | Cy61       | NM_010516        | Mus musculus cysteine rich protein 61 (Cy61), mRNA [NM_010516]                                                                                                                                                                                  |
| A_51_P123895 | 6.5943394 up                                        | NM_053078   | DOH45114   | NM_053078        | Mus musculus DNA segment, human D4S114 (DOH45114), mRNA [NM_053078]                                                                                                                                                                             |
| A_52_P301821 | 6.656651 up                                         | NM_053078   | DOH45114   | NM_053078        | Mus musculus DNA segment, human D4S114 (DOH45114), mRNA [NM_053078]                                                                                                                                                                             |
| A_51_P120636 | 3.176658 up                                         | NM_007891   | E2f1       | NM_007891        | Mus musculus E2F transcription factor 1 (E2f1), mRNA [NM_007891]                                                                                                                                                                                |
| A_52_P587611 | 3.7846649 up                                        | NM_007891   | E2f1       | NM_007891        | Mus musculus E2F transcription factor 1 (E2f1), mRNA [NM_007891]                                                                                                                                                                                |
| A_51_P499871 | 2.5193021 up                                        | L20334      | Edg5       | L20334           | Mouse EDG-like receptor mRNA, partial cds. [L20334]                                                                                                                                                                                             |
| A_51_P499871 | 6.7542095 up                                        | NM_010333   | Edg5       | NM_010333        | Mus musculus endothelial differentiation, sphingolipid G-protein-coupled receptor, 5 (Edg5), mRNA [NM_010333]                                                                                                                                   |
| A_52_P604613 | 6.415614 up                                         | NM_010333   | Edg5       | NM_010333        | Mus musculus endothelial differentiation, sphingolipid G-protein-coupled receptor, 5 (Edg5), mRNA [NM_010333]                                                                                                                                   |
| A_51_P320354 | 3.1780504 up                                        | NM_010155   | Erf1       | NM_010155        | Mus musculus Ets2 regulator factor 1 (Erf1), mRNA [NM_010155]                                                                                                                                                                                   |
| A_51_P224102 | 2.3398597 down                                      | NM_011935   | Esr3       | NM_011935        | Mus musculus estrogen-related receptor gamma (Esr3), mRNA [NM_011935]                                                                                                                                                                           |
| A_52_P317246 | 76.70423 down                                       | NM_011935   | Esr3       | NM_011935        | Mus musculus estrogen-related receptor gamma (Esr3), mRNA [NM_011935]                                                                                                                                                                           |
| A_52_P194250 | 7.0206957 up                                        | NM_011808   | Ets1       | NM_011808        | Mus musculus E26 avian leukemia oncogene 1, 5' domain (Ets1), transcript variant 1, mRNA [NM_011808]                                                                                                                                            |
| A_52_P232830 | 7.1453555 up                                        | NM_011808   | Ets1       | NM_011808        | Mus musculus E26 avian leukemia oncogene 1, 5' domain (Ets1), transcript variant 1, mRNA [NM_011808]                                                                                                                                            |
| A_51_P329043 | 7.3364906 up                                        | X55787      | Ets1       | X55787           | Mus musculus c-ets-1 gene. [X55787]                                                                                                                                                                                                             |
| A_52_P250291 | 9.294166 up                                         | NM_011808   | Ets1       | NM_011808        | Mus musculus E26 avian leukemia oncogene 1, 5' domain (Ets1), transcript variant 1, mRNA [NM_011808]                                                                                                                                            |
| A_51_P490311 | 23.250677 down                                      | NM_010168   | F2r        | NM_010168        | Mus musculus coagulation factor II (F2), mRNA [NM_010168]                                                                                                                                                                                       |
| A_52_P344290 | 4.809881 up                                         | NM_010169   | F2r        | NM_010169        | Mus musculus coagulation factor II (thrombin) receptor (F2r), mRNA [NM_010169]                                                                                                                                                                  |
| A_52_P278336 | 5.3344594 up                                        | NM_011812   | Fbn5       | NM_011812        | Mus musculus fibulin 5 (Fbn5), mRNA [NM_011812]                                                                                                                                                                                                 |
| A_52_P288050 | 5.8763804 up                                        | AK084895    | Fbn5       | AK084895         | Mus musculus 13 days embryo lung cDNA, RIKEN full-length enriched library, clone:d430006M14 product:fibulin 5, full insert sequence. [AK084895]                                                                                                 |
| A_51_P282179 | 2.6078815 down                                      | NM_020009   | Frsp1      | NM_020009        | Mus musculus FK506 binding protein 12-rapamycin associated protein 1 (Frsp1), mRNA [NM_020009]                                                                                                                                                  |
| A_52_P67643  | 3.452959 down                                       | BC043920    | Frsp1      | BC043920         | Mus musculus FK506 binding protein 12-rapamycin associated protein 1, mRNA (cDNA clone IMAGE5064192), complete cds. [BC043920]                                                                                                                  |
| A_51_P441798 | 6.143435 down                                       | X16314      | Glu        | X16314           | Mus musculus mRNA for glutamine synthetase. [X16314]                                                                                                                                                                                            |
| A_52_P101279 | 8.605247 down                                       | NM_008131   | Glu        | NM_008131        | Mus musculus glutamate-ammonia ligase (glutamine synthetase) (Glu), mRNA [NM_008131]                                                                                                                                                            |
| A_52_P143866 | 9.359642 down                                       | NM_008131   | Glu        | NM_008131        | Mus musculus glutamate-ammonia ligase (glutamine synthetase) (Glu), mRNA [NM_008131]                                                                                                                                                            |
| A_51_P498004 | 2.1664174 down                                      | NM_010301   | Gria11     | NM_010301        | Mus musculus guanine nucleotide binding protein, alpha 11 (Gria11), mRNA [NM_010301]                                                                                                                                                            |
| A_52_P366932 | 2.2694962 down                                      | NM_010301   | Gria11     | NM_010301        | Mus musculus guanine nucleotide binding protein, alpha 11 (Gria11), mRNA [NM_010301]                                                                                                                                                            |
| A_51_P275623 | 4.711687 down                                       | NM_015828   | Gne        | NM_015828        | Mus musculus glucosaminase (Gne), mRNA [NM_015828]                                                                                                                                                                                              |
| A_52_P37593  | 4.7818285 down                                      | NM_015828   | Gne        | NM_015828        | Mus musculus glucosaminase (Gne), mRNA [NM_015828]                                                                                                                                                                                              |
| A_52_P189099 | 8.8575535 down                                      | AK033507    | Gne        | AK033507         | Mus musculus adult male colon cDNA, RIKEN full-length enriched library, clone:9030414E18 product:UDP-N-acetylglucosamine-2-epimerase [AK033507]                                                                                                 |
| A_52_P45841  | 2.8249576 down                                      | NM_028976   | Gorasp1    | NM_028976        | Mus musculus golgi reassembly stacking protein 1 (Gorasp1), mRNA [NM_028976]                                                                                                                                                                    |
| A_52_P68221  | 5.018613 up                                         | NM_016886   | Gria3      | NM_016886        | Mus musculus glutamate receptor, ionotropic, AMPA3 (alpha 3) (Gria3), mRNA [NM_016886]                                                                                                                                                          |
| A_52_P179309 | 5.3627505 up                                        | NM_016886   | Gria3      | NM_016886        | Mus musculus glutamate receptor, ionotropic, AMPA3 (alpha 3) (Gria3), mRNA [NM_016886]                                                                                                                                                          |
| A_52_P272364 | 6.907053 up                                         | AK161163    | Gria3      | AK161163         | Mus musculus 0 day neonate head cDNA, RIKEN full-length enriched library, clone:483140116 product:glutamate receptor, ionotropic, AMPA3 (alpha 3), full insert sequence. [AK161163]                                                             |
| A_51_P112223 | 4.4080848 down                                      | NM_010357   | Gria3      | NM_010357        | Mus musculus glutamate receptor, ionotropic, alpha 3 (Gria3), mRNA [NM_010357]                                                                                                                                                                  |
| A_52_P466741 | 1.1672565 down                                      | NM_011826   | Hax1       | NM_011826        | Mus musculus HCLS1 associated X-1 (Hax1), mRNA [NM_011826]                                                                                                                                                                                      |
| A_51_P437697 | 1.3066484 down                                      | NM_011826   | Hax1       | NM_011826        | Mus musculus HCLS1 associated X-1 (Hax1), mRNA [NM_011826]                                                                                                                                                                                      |
| A_52_P572818 | 2.070577 down                                       | AF023483    | Hax1       | AF023483         | Mus musculus HS-1-associating protein HAX-1 (mHAX-1) pseudogene mRNA, complete sequence. [AF023483]                                                                                                                                             |
| A_52_P29583  | 1.191088 down                                       | AK016742    | Hpk2       | AK016742         | Mus musculus adult male testis cDNA, RIKEN full-length enriched library, clone:4933408M17 product:homeodomain interacting protein kinase 2, full insert sequence. [AK016742]                                                                    |
| A_51_P318292 | 1.8150687 down                                      | NM_010433   | Hpk2       | NM_010433        | Mus musculus homeodomain interacting protein kinase 2 (Hpk2), mRNA [NM_010433]                                                                                                                                                                  |
| A_52_P504845 | 1.8751788 down                                      | NM_010433   | Hpk2       | NM_010433        | Mus musculus homeodomain interacting protein kinase 2 (Hpk2), mRNA [NM_010433]                                                                                                                                                                  |
| A_51_P215316 | 2.2076242 down                                      | AK037318    | Hpk2       | AK037318         | Mus musculus 18-day embryo whole body cDNA, RIKEN full-length enriched library, clone:1110014C20 product:unclassified, full insert sequence. [AK037318]                                                                                         |
| A_51_P517182 | 1.3813775 down                                      | AK052657    | Hrasl3     | AK052657         | Mus musculus adult male kidney cDNA, RIKEN full-length enriched library, clone:DG30015C01 product:HRV 107 PROTEIN homolog (Rattus norvegicus), full insert sequence. [AK052657]                                                                 |
| A_52_P154800 | 3.2264626 down                                      | NM_139269   | Hrasl3     | NM_139269        | Mus musculus HRAS like suppressor 3 (Hrasl3), mRNA [NM_139269]                                                                                                                                                                                  |
| A_52_P90363  | 2.305422 down                                       | NM_029803   | Il27       | NM_029803        | Mus musculus interferon, alpha-inducible protein 27 (Il27), mRNA [NM_029803]                                                                                                                                                                    |
| A_51_P358233 | 2.4438343 down                                      | AK010014    | Il27       | AK010014         | Mus musculus adult male tongue cDNA, RIKEN full-length enriched library, clone:2310061N23 product:similar to ALPHA-INTERFERON INDUCIBLE PROTEIN (FRAGMENT) [Mesocricetus auratus], full insert sequence. [AK010014]                             |
| A_52_P90364  | 7.517165 down                                       | NM_029803   | Il27       | NM_029803        | Mus musculus interferon, alpha-inducible protein 27 (Il27), mRNA [NM_029803]                                                                                                                                                                    |
| A_51_P490305 | 5.010123 down                                       | NM_023065   | Il30       | NM_023065        | Mus musculus interferon gamma inducible protein 30 (Il30), mRNA [NM_023065]                                                                                                                                                                     |
| A_52_P15461  | 2.1396448 down                                      | NM_008357   | Il15       | NM_008357        | Mus musculus interleukin 15 (Il15), mRNA [NM_008357]                                                                                                                                                                                            |
| A_52_P383066 | 2.6090174 down                                      | AB022307    | Il15       | AB022307         | Mus musculus mRNA for shorter isoform of interleukin 15, partial cds. [AB022307]                                                                                                                                                                |
| A_51_P239750 | 15.527142 up                                        | NM_008380   | Inhba      | NM_008380        | Mus musculus inhibin beta-A (Inhba), mRNA [NM_008380]                                                                                                                                                                                           |

|               |           |      |              |          |              |                                                                                                                                                                                                           |
|---------------|-----------|------|--------------|----------|--------------|-----------------------------------------------------------------------------------------------------------------------------------------------------------------------------------------------------------|
| A_52_0549279  | 1.7002345 | down | NM_172944    | Igtae    | NM_172944    | Mus musculus integrin, alpha E, epithelial-associated (Igtae), transcript variant 2, mRNA [NM_172944]                                                                                                     |
| A_51_0352076  | 2.2181423 | down | NM_008399    | Igtae    | NM_008399    | Mus musculus integrin, alpha E, epithelial-associated (Igtae), transcript variant 2, mRNA [NM_008399]                                                                                                     |
| A_51_0425680  | 3.261504  | down | NM_019826    | Ivd      | NM_019826    | Mus musculus isovaleryl coenzyme A dehydrogenase (Ivd), mRNA [NM_019826]                                                                                                                                  |
| A_52_0550069  | 3.5622003 | down | NM_019826    | Ivd      | NM_019826    | Mus musculus isovaleryl coenzyme A dehydrogenase (Ivd), mRNA [NM_019826]                                                                                                                                  |
| A_51_0319410  | 5.449637  | up   | NM_008478    | L1cam    | NM_008478    | Mus musculus L1 cell adhesion molecule (L1cam), mRNA [NM_008478]                                                                                                                                          |
| A_51_0465281  | 5.0744843 | up   | NM_008495    | Lgals1   | NM_008495    | Mus musculus lectin, galactose binding, soluble 1 (Lgals1), mRNA [NM_008495]                                                                                                                              |
| A_52_0480351  | 8.826755  | up   | XM_985144    | Lox12    | XM_985144    | PREDICTED: Mus musculus lysyl oxidase-like 2 (Lox12), mRNA [XM_985144]                                                                                                                                    |
| A_51_0275949  | 9.040233  | up   | NM_033325    | Lox12    | NM_033325    | Mus musculus lysyl oxidase-like 2 (Lox12), mRNA [NM_033325]                                                                                                                                               |
| A_52_0189946  | 2.759351  | up   | NM_019199    | Ltbp1    | NM_019199    | Mus musculus latent transforming growth factor beta binding protein 1 (Ltbp1), transcript variant 1, mRNA [NM_019199]                                                                                     |
| A_51_0281716  | 5.700854  | up   | NM_019199    | Ltbp1    | NM_019199    | Mus musculus latent transforming growth factor beta binding protein 1 (Ltbp1), transcript variant 1, mRNA [NM_019199]                                                                                     |
| A_51_0257457  | 3.849494  | up   | NM_013589    | Ltbp2    | NM_013589    | Mus musculus latent transforming growth factor beta binding protein 2 (Ltbp2), mRNA [NM_013589]                                                                                                           |
| A_52_0425632  | 2.562844  | down | NM_025649    | Mad21bp  | NM_025649    | Mus musculus MAD2L1 binding protein (Mad21bp), mRNA [NM_025649]                                                                                                                                           |
| A_51_0246270  | 6.409573  | up   | NM_008597    | Mgp      | NM_008597    | Mus musculus matrix Gla protein (Mgp), mRNA [NM_008597]                                                                                                                                                   |
| A_52_0415168  | 30.265642 | down | NM_019394    | Mia1     | NM_019394    | Mus musculus melanoma inhibitory activity 1 (Mia1), mRNA [NM_019394]                                                                                                                                      |
| A_52_0415167  | 31.490252 | down | NM_019394    | Mia1     | NM_019394    | Mus musculus melanoma inhibitory activity 1 (Mia1), mRNA [NM_019394]                                                                                                                                      |
| A_52_0174346  | 31.516293 | down | NM_019394    | Mia1     | NM_019394    | Mus musculus melanoma inhibitory activity 1 (Mia1), mRNA [NM_019394]                                                                                                                                      |
| A_51_0216303  | 6.9670506 | up   | NM_008608    | Mmp14    | NM_008608    | Mus musculus matrix metalloproteinase 14 (membrane-inserted) (Mmp14), mRNA [NM_008608]                                                                                                                    |
| A_52_0304128  | 9.432858  | up   | NM_008608    | Mmp14    | NM_008608    | Mus musculus matrix metalloproteinase 14 (membrane-inserted) (Mmp14), mRNA [NM_008608]                                                                                                                    |
| A_52_0127130  | 8.683262  | up   | NM_031195    | Msr1     | NM_031195    | Mus musculus macrophage scavenger receptor 1 (Msr1), mRNA [NM_031195]                                                                                                                                     |
| A_51_0404846  | 9.584209  | up   | NM_031195    | Msr1     | NM_031195    | Mus musculus macrophage scavenger receptor 1 (Msr1), mRNA [NM_031195]                                                                                                                                     |
| A_52_0607128  | 9.630034  | up   | NM_031195    | Msr1     | NM_031195    | Mus musculus macrophage scavenger receptor 1 (Msr1), mRNA [NM_031195]                                                                                                                                     |
| A_52_0320971  | 2.598462  | down | NM_013603    | M3       | NM_013603    | Mus musculus metallothionein 3 (M3), mRNA [NM_013603]                                                                                                                                                     |
| A_51_0303823  | 2.1514068 | down | NM_013752    | Nbn      | NM_013752    | Mus musculus nibrin (Nbn), mRNA [NM_013752]                                                                                                                                                               |
| A_52_0298548  | 2.3453636 | down | NM_013752    | Nbn      | NM_013752    | Mus musculus nibrin (Nbn), mRNA [NM_013752]                                                                                                                                                               |
| A_52_0860172  | 2.933912  | down | AK085134     | Nbn      | AK085134     | Mus musculus 13 days embryo lung cDNA, RIKEN full-length enriched library, clone:D430042D16 product:unclassified, full insert sequence. [AK085134]                                                        |
| A_52_0907073  | 2.0523741 | down | AK019159     | Neo1     | AK019159     | Mus musculus 10 days embryo whole body cDNA, RIKEN full-length enriched library, clone:2610028H22 product:unclassified, full insert sequence. [AK019159]                                                  |
| A_51_0476728  | 2.1847363 | down | NM_008684    | Neo1     | NM_008684    | Mus musculus neogenin (Neo1), transcript variant 1, mRNA [NM_008684]                                                                                                                                      |
| A_52_0290003  | 2.804242  | down | NM_008684    | Neo1     | NM_008684    | Mus musculus neogenin (Neo1), transcript variant 1, mRNA [NM_008684]                                                                                                                                      |
| A_51_0452323  | 7.772345  | up   | NM_016701    | Nes      | NM_016701    | Mus musculus nestin (Nes), mRNA [NM_016701]                                                                                                                                                               |
| A_51_0460143  | 10.083625 | down | NM_015750    | Neu2     | NM_015750    | Mus musculus neuraminidase 2 (Neu2), mRNA [NM_015750]                                                                                                                                                     |
| A_52_0183088  | 2.1586757 | up   | NM_008714    | Notch1   | NM_008714    | Mus musculus Notch gene homolog 1 (Drosophila) (Notch1), mRNA [NM_008714]                                                                                                                                 |
| A_51_0508510  | 2.2233179 | up   | Z11886       | Notch1   | Z11886       | M.musculus notch-1 mRNA. [Z11886]                                                                                                                                                                         |
| A_52_0225912  | 3.6903982 | up   | NM_130866    | Olfir78  | NM_130866    | Mus musculus olfactory receptor 78 (Olfir78), mRNA [NM_130866]                                                                                                                                            |
| A_52_0495729  | 2.6905644 | up   | NM_011019    | Osmr     | NM_011019    | Mus musculus oncostatin M receptor (Osmr), mRNA [NM_011019]                                                                                                                                               |
| A_51_0319460  | 2.7220554 | up   | NM_011019    | Osmr     | NM_011019    | Mus musculus oncostatin M receptor (Osmr), mRNA [NM_011019]                                                                                                                                               |
| A_52_0370274  | 7.3907814 | up   | AK171700     | Pde4b    | AK171700     | Mus musculus activated spleen cDNA, RIKEN full-length enriched library, clone:F83000509 product:phosphodiesterase 4b, cAMP specific, full insert sequence. [AK171700]                                     |
| A_52_0423247  | 8.59967   | up   | NM_019840    | Pde4b    | NM_019840    | Mus musculus phosphodiesterase 4b, cAMP specific (Pde4b), mRNA [NM_019840]                                                                                                                                |
| A_51_0512340  | 9.169716  | up   | NM_019840    | Pde4b    | NM_019840    | Mus musculus phosphodiesterase 4b, cAMP specific (Pde4b), mRNA [NM_019840]                                                                                                                                |
| A_51_0224311  | 5.4113717 | down | NM_022318    | Popdc2   | NM_022318    | Mus musculus popeye domain containing 2 (Popdc2), transcript variant 2, mRNA [NM_022318]                                                                                                                  |
| A_52_027332   | 1.1177047 | down | NM_012023    | Ppp2r5c  | NM_012023    | Mus musculus protein phosphatase 2, regulatory subunit B (B56), gamma isoform (Ppp2r5c), transcript variant 1, mRNA [NM_012023]                                                                           |
| A_51_0320523  | 2.1761737 | down | NM_012023    | Ppp2r5c  | NM_012023    | Mus musculus protein phosphatase 2, regulatory subunit B (B56), gamma isoform (Ppp2r5c), transcript variant 1, mRNA [NM_012023]                                                                           |
| A_52_0166952  | 2.2764115 | down | NM_001081458 | Ppp2r5c  | NM_001081458 | Mus musculus protein phosphatase 2, regulatory subunit B (B56), gamma isoform (Ppp2r5c), transcript variant 3, mRNA [NM_001081458]                                                                        |
| A_52_094495   | 1.2268181 | up   | AK050059     | Prkcn    | AK050059     | Mus musculus adult male liver tumor cDNA, RIKEN full-length enriched library, clone:C73000023 product:weakly similar to PROTEIN KINASE C BETA (FRAGMENT) [Homo sapiens], full insert sequence. [AK050059] |
| A_51_0413965  | 1.645991  | up   | DV056587     | Prkcn    | DV056587     | DLPO1_18_M21.x2 FH DLPO1 Mus musculus cDNA clone DLPO1_18_M21 similar to Protein Kinase C nu, mRNA sequence [DV056587]                                                                                    |
| A_51_0106397  | 1.9773166 | up   | NM_029239    | Prkcn    | NM_029239    | Mus musculus protein kinase C, nu (Prkcn), mRNA [NM_029239]                                                                                                                                               |
| A_52_0669996  | 2.161055  | up   | NM_029239    | Prkcn    | NM_029239    | Mus musculus protein kinase C, nu (Prkcn), mRNA [NM_029239]                                                                                                                                               |
| A_52_01012802 | 2.893061  | up   | NM_008982    | Ptpjr    | NM_008982    | Mus musculus protein tyrosine phosphatase, receptor type, j (Ptpjr), mRNA [NM_008982]                                                                                                                     |
| A_52_019161   | 3.9330317 | up   | NM_008982    | Ptpjr    | NM_008982    | Mus musculus protein tyrosine phosphatase, receptor type, j (Ptpjr), mRNA [NM_008982]                                                                                                                     |
| A_52_0162687  | 1.121824  | up   | NM_027514    | Pvr      | NM_027514    | Mus musculus poliovirus receptor (Pvr), mRNA [NM_027514]                                                                                                                                                  |
| A_52_0162695  | 1.7960799 | up   | NM_027514    | Pvr      | NM_027514    | Mus musculus poliovirus receptor (Pvr), mRNA [NM_027514]                                                                                                                                                  |
| A_52_0628590  | 1.9556673 | up   | NM_027514    | Pvr      | NM_027514    | Mus musculus poliovirus receptor (Pvr), mRNA [NM_027514]                                                                                                                                                  |
| A_51_0237097  | 2.0245855 | up   | NM_027514    | Pvr      | NM_027514    | Mus musculus poliovirus receptor (Pvr), mRNA [NM_027514]                                                                                                                                                  |
| A_52_0225377  | 4.047059  | up   | AK014446     | Pvr      | AK014446     | Mus musculus 18 days pregnant adult female placenta and extra embryonic tissue cDNA, RIKEN full-length enriched library, clone:3830421F03 product:hypothetical protein, full insert sequence. [AK014446]  |
| A_51_0241733  | 2.8632343 | down | NM_145435    | Pyy      | NM_145435    | Mus musculus peptide YY (Pyy), mRNA [NM_145435]                                                                                                                                                           |
| A_52_0366462  | 15.498475 | down | NM_145435    | Pyy      | NM_145435    | Mus musculus peptide YY (Pyy), mRNA [NM_145435]                                                                                                                                                           |
| A_51_0314763  | 1.4071349 | down | NM_011231    | Rabggtb  | NM_011231    | Mus musculus RAB geranylgeranyl transferase, b subunit (Rabggtb), mRNA [NM_011231]                                                                                                                        |
| A_52_0430628  | 1.5020984 | down | NM_011231    | Rabggtb  | NM_011231    | Mus musculus RAB geranylgeranyl transferase, b subunit (Rabggtb), mRNA [NM_011231]                                                                                                                        |
| A_52_0682873  | 2.1243684 | down | BC057661     | Rabggtb  | BC057661     | Mus musculus RAB geranylgeranyl transferase, b subunit, mRNA (cDNA clone IMAGE:3155581), complete cds. [BC057661]                                                                                         |
| A_52_026409   | 2.35221   | up   | M32070       | Rarg     | M32070       | Mouse retinoic acid receptor gamma 3 mRNA, 5' end. [M32070]                                                                                                                                               |
| A_51_0372853  | 2.856912  | up   | NM_011244    | Rarg     | NM_011244    | Mus musculus retinoic acid receptor, gamma (Rarg), transcript variant 1, mRNA [NM_011244]                                                                                                                 |
| A_51_0372858  | 3.0058188 | up   | NM_011244    | Rarg     | NM_011244    | Mus musculus retinoic acid receptor, gamma (Rarg), transcript variant 1, mRNA [NM_011244]                                                                                                                 |
| A_52_0380418  | 3.537931  | up   | M32070       | Rarg     | M32070       | Mouse retinoic acid receptor gamma 3 mRNA, 5' end. [M32070]                                                                                                                                               |
| A_51_0271644  | 2.75481   | down | NM_011246    | Rasgrp1  | NM_011246    | Mus musculus RAS guanyl releasing protein 1 (Rasgrp1), mRNA [NM_011246]                                                                                                                                   |
| A_52_0487303  | 8.492334  | down | NM_011246    | Rasgrp1  | NM_011246    | Mus musculus RAS guanyl releasing protein 1 (Rasgrp1), mRNA [NM_011246]                                                                                                                                   |
| A_51_0224903  | 1.8568233 | up   | NM_009062    | Rgs4     | NM_009062    | Mus musculus regulator of G-protein signaling 4 (Rgs4), mRNA [NM_009062]                                                                                                                                  |
| A_52_043326   | 2.3301473 | up   | NM_009062    | Rgs4     | NM_009062    | Mus musculus regulator of G-protein signaling 4 (Rgs4), mRNA [NM_009062]                                                                                                                                  |
| A_51_0314375  | 2.6451383 | down | NM_080844    | Serpinc1 | NM_080844    | Mus musculus serine (or cysteine) peptidase inhibitor, clade C (antithrombin), member 1 (Serpinc1), mRNA [NM_080844]                                                                                      |
| A_52_0409746  | 3.580984  | down | NM_080844    | Serpinc1 | NM_080844    | Mus musculus serine (or cysteine) peptidase inhibitor, clade C (antithrombin), member 1 (Serpinc1), mRNA [NM_080844]                                                                                      |
| A_51_0183571  | 15.32139  | up   | NM_008871    | Serpinc1 | NM_008871    | Mus musculus serine (or cysteine) peptidase inhibitor, clade E, member 1 (Serpinc1), mRNA [NM_008871]                                                                                                     |
| A_51_0145520  | 5.5402393 | down | NM_023059    | Sigirr   | NM_023059    | Mus musculus single immunoglobulin and toll-interleukin 1 receptor (TIR) domain (Sigirr), mRNA [NM_023059]                                                                                                |
| A_52_0640221  | 6.283906  | down | NM_008767    | Slc22a18 | NM_008767    | Mus musculus solute carrier family 22 (organic cation transporter), member 18 (Slc22a18), transcript variant 1, mRNA [NM_008767]                                                                          |
| A_51_0165882  | 8.795703  | down | NM_008767    | Slc22a18 | NM_008767    | Mus musculus solute carrier family 22 (organic cation transporter), member 18 (Slc22a18), transcript variant 1, mRNA [NM_008767]                                                                          |
| A_51_0372826  | 3.7735744 | up   | NM_145533    | Smox     | NM_145533    | Mus musculus spermine oxidase (Smox), mRNA [NM_145533]                                                                                                                                                    |
| A_52_0430194  | 5.8303814 | up   | AK087437     | Smox     | AK087437     | Mus musculus 0 day neonate eyball cDNA, RIKEN full-length enriched library, clone:E130115D16 product:POLYAMINE OXIDASE ISOFORM-3 homolog [Homo sapiens], full insert sequence. [AK087437]                 |
| A_51_0474459  | 5.173515  | up   | NM_007707    | Socs3    | NM_007707    | Mus musculus suppressor of cytokine signaling 3 (Socs3), mRNA [NM_007707]                                                                                                                                 |
| A_52_0204311  | 9.630001  | up   | NM_011898    | Spry4    | NM_011898    | Mus musculus sprouty homolog 4 (Drosophila) (Spry4), mRNA [NM_011898]                                                                                                                                     |
| A_51_0390715  | 5.047894  | up   | NM_011577    | Tgfb1    | NM_011577    | Mus musculus transforming growth factor, beta 1 (Tgfb1), mRNA [NM_011577]                                                                                                                                 |
| A_52_0337092  | 2.0655103 | up   | NM_011580    | Thbs1    | NM_011580    | Mus musculus thrombospondin 1 (Thbs1), mRNA [NM_011580]                                                                                                                                                   |
| A_52_0337086  | 4.5024614 | up   | NM_011580    | Thbs1    | NM_011580    | Mus musculus thrombospondin 1 (Thbs1), mRNA [NM_011580]                                                                                                                                                   |
| A_52_0363951  | 4.5403414 | up   | NM_011580    | Thbs1    | NM_011580    | Mus musculus thrombospondin 1 (Thbs1), mRNA [NM_011580]                                                                                                                                                   |
| A_51_0388835  | 2.7979338 | down | NM_009380    | Thrb     | NM_009380    | Mus musculus thyroid hormone receptor beta (Thrb), mRNA [NM_009380]                                                                                                                                       |
| A_52_0532559  | 3.1085851 | down | AK158826     | Thrb     | AK158826     | Mus musculus visual cortex cDNA, RIKEN full-length enriched library, clone:X430339A03 product:thyroid hormone receptor beta, full insert sequence. [AK158826]                                             |
| A_51_0877015  | 3.785894  | down | BC089035     | Thrb     | BC089035     | Mus musculus thyroid hormone receptor beta, mRNA (cDNA clone MGC:115768 IMAGE:30695885), complete cds. [BC089035]                                                                                         |
| A_51_0313532  | 1.9120182 | down | NM_027154    | Timb1    | NM_027154    | Mus musculus transmembrane BAX inhibitor motif containing 1 (Timb1), mRNA [NM_027154]                                                                                                                     |
| A_52_0461378  | 2.0281549 | down | NM_027154    | Timb1    | NM_027154    | Mus musculus transmembrane BAX inhibitor motif containing 1 (Timb1), mRNA [NM_027154]                                                                                                                     |
| A_52_0127362  | 1.5548475 | down | NM_029478    | Tmem49   | NM_029478    | Mus musculus transmembrane protein 49 (Tmem49), mRNA [NM_029478]                                                                                                                                          |
| A_52_0413448  | 2.1169481 | down | AK019443     | Tmem49   | AK019443     | Mus musculus 13 days embryo head cDNA, RIKEN full-length enriched library, clone:3110098I04 product:unclassified, full insert sequence. [AK019443]                                                        |
| A_51_0439746  | 4.2890396 | down | NM_029478    | Tmem49   | NM_029478    | Mus musculus transmembrane protein 49 (Tmem49), mRNA [NM_029478]                                                                                                                                          |
| A_51_0278282  | 1.5826579 | down | NM_011610    | Tfr1f1b  | NM_011610    | Mus musculus tumor necrosis factor receptor superfamily, member 1b (Tfr1f1b), mRNA [NM_011610]                                                                                                            |
| A_52_0228621  | 2.2646317 | up   | NM_011610    | Tfr1f1b  | NM_011610    | Mus musculus tumor necrosis factor receptor superfamily, member 1b (Tfr1f1b), mRNA [NM_011610]                                                                                                            |
| A_52_0151853  | 2.8686774 | down | NM_009412    | Tp52     | NM_009412    | Mus musculus tumor protein D52 (Tp52), transcript variant 5, mRNA [NM_009412]                                                                                                                             |
| A_51_0506792  | 3.239838  | down | NM_009412    | Tp52     | NM_009412    | Mus musculus tumor protein D52 (Tp52), transcript variant 5, mRNA [NM_009412]                                                                                                                             |
| A_52_0383913  | 3.6701207 | up   | AK020775     | Trim35   | AK020775     | Mus musculus 0 day neonate thymus cDNA, RIKEN full-length enriched library, clone:A430106H13 product:tripartite motif-containing 35, full insert sequence. [AK020775]                                     |
| A_52_045738   | 5.755788  | up   | NM_029979    | Trim35   | NM_029979    | Mus musculus tripartite motif-containing 35 (Trim35), mRNA [NM_029979]                                                                                                                                    |
| A_51_0373777  | 6.833079  | up   | NM_029979    | Trim35   | NM_029979    | Mus musculus tripartite motif-containing 35 (Trim35), mRNA [NM_029979]                                                                                                                                    |
| A_51_0173656  | 3.2427914 | up   | NM_134028    | Tubg2    | NM_134028    | Mus musculus tubulin, gamma 2 (Tubg2), mRNA [NM_134028]                                                                                                                                                   |
| A_51_0109840  | 3.8641542 | down | NM_011707    | Vtn      | NM_011707    | Mus musculus vimentin (Vtn), mRNA [NM_011707]                                                                                                                                                             |
| A_51_0390804  | 2.9994416 | up   | NM_016873    | Wnt1     | NM_016873    | Mus musculus WNT1 inducible signaling pathway protein 2 (Wisp2), mRNA [NM_016873]                                                                                                                         |
| A_51_0121006  | 4.979566  | up   | NM_015753    | Zeb2     | NM_015753    | Mus musculus zinc finger E-box binding homeobox 2 (Zeb2), transcript variant 2, mRNA [NM_015753]                                                                                                          |

|              |             |           |      |           |                                                                                                                                                                       |
|--------------|-------------|-----------|------|-----------|-----------------------------------------------------------------------------------------------------------------------------------------------------------------------|
| A_52_P526372 | 6.219306 up | NM_015753 | Zeb2 | NM_015753 | Mus musculus zinc finger E-box binding homeobox 2 (Zeb2), transcript variant 2, mRNA [NM_015753]                                                                      |
| A_52_P596008 | 6.952508 up | NM_015753 | Zeb2 | NM_015753 | Mus musculus zinc finger E-box binding homeobox 2 (Zeb2), transcript variant 2, mRNA [NM_015753]                                                                      |
| A_51_P106893 | 7.538661 up | AK051204  | Zeb2 | AK051204  | Mus musculus 12 days embryo spinal ganglion cDNA, RIKEN full-length enriched library, clone: D130016B08 product:undclassifiable, full insert sequence. [AK051204]     |
| A_52_P587928 | 8.078221 up | AK031541  | Zeb2 | AK031541  | Mus musculus 13 days embryo male testis cDNA, RIKEN full-length enriched library, clone: 6030449F06 product:zinc finger homeobox 1b, full insert sequence. [AK031541] |

List of cancer genes that were up or down regulated in two tumor samples with respect to their normal controls (genes that were affected at least by 2 fold with p value  $\leq 0.01$  were listed here)

Genes that exhibited at least by 2 fold with p value  $\leq 0.01$  were listed here
