# Supplementary material for: Predisposition to Cancer Caused by Genetic and Functional Defects of Mammalian Atad5
Source: PubMed Central journal article supplement (PMC3161924; doi:10.1371/journal.pgen.1002245), 2011-08-25
Supplement: pgen.1002245.s007.pdf [file pgen.1002245.s007.pdf]

Table S3. Genes that showed both altered expression and copy number in murine tumors.

Down regulated and deleted

| ProbeName    | Fold change | Regulation | (Common name) | GeneSymbol | Description                                                                                                                                               | GenbankAccession |
|--------------|-------------|------------|---------------|------------|-----------------------------------------------------------------------------------------------------------------------------------------------------------|------------------|
| A_51_P336282 | 3.319486    | down       | NM_010934     | Npy1r      | Mus musculus neuropeptide Y receptor Y1 (Npy1r), mRNA [NM_010934]                                                                                         | NM_010934        |
| A_51_P390884 | 2.516718    | down       | NM_011862     | Pacsin2    | Mus musculus protein kinase C and casein kinase substrate in neurons 2 (Pacsin2), mRNA [NM_011862]                                                        | NM_011862        |
| A_52_P229648 | 2.598706    | down       | NM_011862     | Pacsin2    | Mus musculus protein kinase C and casein kinase substrate in neurons 2 (Pacsin2), mRNA [NM_011862]                                                        | NM_011862        |
| A_52_P407941 | 1.484856    | down       | NM_172125     | Adam1b     | Mus musculus a disintegrin and metallopeptidase domain 1b (Adam1b), mRNA [NM_172125]                                                                      | NM_172125        |
| A_51_P381670 | 1.249522    | down       | NM_023066     | Asph       | Mus musculus aspartate-beta-hydroxylase (Asph), transcript variant 1, mRNA [NM_023066]                                                                    | NM_023066        |
| A_51_P253531 | 3.800577    | down       | NM_026097     | Rffl       | Mus musculus ring finger and FYVE like domain containing protein (Rffl), transcript variant 2, mRNA [NM_026097]                                           | NM_026097        |
| A_52_P356698 | 1.938858    | down       | NM_013665     | Shox2      | Mus musculus short stature homeobox 2 (Shox2), mRNA [NM_013665]                                                                                           | NM_013665        |
| A_52_P399175 | 2.815641    | down       | NM_001007     | Rffl       | Mus musculus ring finger and FYVE like domain containing protein (Rffl), transcript variant 1, mRNA [NM_001007465]                                        | NM_001007465     |
| A_51_P346842 | 1.528089    | down       | NM_001081     | Pcdh11x    | Mus musculus protocadherin 11 X-linked (Pcdh11x), mRNA [NM_001081385]                                                                                     | NM_001081385     |
| A_52_P545393 | 2.563429    | down       | NM_011862     | Pacsin2    | Mus musculus protein kinase C and casein kinase substrate in neurons 2 (Pacsin2), mRNA [NM_011862]                                                        | NM_011862        |
| A_52_P625171 | 1.775249    | down       | NM_133723     | Asph       | Mus musculus aspartate-beta-hydroxylase (Asph), transcript variant 2, mRNA [NM_133723]                                                                    | NM_133723        |
| A_52_P679869 | 1.037685    | down       | NM_001081     | Pcdh11x    | Mus musculus protocadherin 11 X-linked (Pcdh11x), mRNA [NM_001081385]                                                                                     | NM_001081385     |
| A_51_P344447 | 5.632451    | down       | NM_172125     | Adam1b     | Mus musculus a disintegrin and metallopeptidase domain 1b (Adam1b), mRNA [NM_172125]                                                                      | NM_172125        |
| A_52_P124219 | 1.485787    | down       | AK054261      | Pot1b      | Mus musculus 2 days pregnant adult female ovary cDNA, RIKEN full-length enriched library, clone:E330005B05 product: AK054261                              | AK054261         |
| A_51_P253527 | 3.733293    | down       | NM_026097     | Rffl       | Mus musculus ring finger and FYVE like domain containing protein (Rffl), transcript variant 2, mRNA [NM_026097]                                           | NM_026097        |
| A_51_P453079 | 1.52097     | down       | NM_148943     | Usp9y      | Mus musculus ubiquitin specific peptidase 9, Y chromosome (Usp9y), mRNA [NM_148943]                                                                       | NM_148943        |
| A_52_P306351 | 1.910277    | down       | AK165260      | Asph       | Mus musculus 6 days neonate spleen cDNA, RIKEN full-length enriched library, clone:F430004K08 product: aspartate-beta-hydroxylase (Asph), mRNA [AK165260] | AK165260         |

Upregulated and amplified

| ProbeName    | Fold change | Regulation | (Common name) | GeneSymbol | Description                                                                                                                                                           | GenbankAccession |
|--------------|-------------|------------|---------------|------------|-----------------------------------------------------------------------------------------------------------------------------------------------------------------------|------------------|
| A_51_P140321 | 1.415056    | up         | NM_026779     | Mocos      | Mus musculus molybdenum cofactor sulfurase (Mocos), mRNA [NM_026779]                                                                                                  | NM_026779        |
| A_52_P75348  | 4.343492    | up         | NM_027411     | Ccdc99     | Mus musculus coiled-coil domain containing 99 (Ccdc99), mRNA [NM_027411]                                                                                              | NM_027411        |
| A_52_P622600 | 1.189097    | up         | AK013536      | 30100260C  | Mus musculus adult male hippocampus cDNA, RIKEN full-length enriched library, clone:2900016G09 product: hypothetical protein, mRNA [AK013536]                         | AK013536         |
| A_51_P415126 | 2.265005    | up         | NM_031199     | Tgfa       | Mus musculus transforming growth factor alpha (Tgfa), mRNA [NM_031199]                                                                                                | NM_031199        |
| A_51_P454993 | 1.637344    | up         | NM_178874     | Tmcc2      | Mus musculus transmembrane and coiled-coil domains 2 (Tmcc2), mRNA [NM_178874]                                                                                        | NM_178874        |
| A_52_P231217 | 1.263406    | up         | AK050320      | Nfia       | Mus musculus adult male liver tumor cDNA, RIKEN full-length enriched library, clone:C730037C02 product: nuclear factor of activated T-cells 3 (Nfia), mRNA [AK050320] | AK050320         |
| A_52_P633550 | 2.851515    | up         | AK053579      | Ghr        | Mus musculus 0 day neonate eyeball cDNA, RIKEN full-length enriched library, clone:E130111P21 product: growth hormone receptor (Ghr), mRNA [AK053579]                 | AK053579         |
| A_51_P121302 | 1.173367    | up         | NM_029431     | Them4      | Mus musculus thioesterase superfamily member 4 (Them4), mRNA [NM_029431]                                                                                              | NM_029431        |
| A_52_P661044 | 1.471235    | up         | NM_009914     | Ccr3       | Mus musculus chemokine (C-C motif) receptor 3 (Ccr3), mRNA [NM_009914]                                                                                                | NM_009914        |
| A_52_P101496 | 1.413626    | up         | BC002033      | Rad50      | Mus musculus RAD50 homolog (S. cerevisiae), mRNA (cDNA clone IMAGE:3491597), complete cds. [BC002033]                                                                 | BC002033         |
| A_51_P508853 | 1.73272     | up         | AK030095      | Ep400      | Mus musculus adult male testis cDNA, RIKEN full-length enriched library, clone:4932441J05 product: similar to P400 SWI6, mRNA [AK030095]                              | AK030095         |
| A_51_P427317 | 1.15792     | up         | NM_013855     | Abca3      | Mus musculus ATP-binding cassette, sub-family A (ABC1), member 3 (Abca3), transcript variant 1, mRNA [NM_013855]                                                      | NM_013855        |
| A_52_P84315  | 1.275373    | up         | NM_001081     | Chd7       | Mus musculus chromodomain helicase DNA binding protein 7 (Chd7), mRNA [NM_001081417]                                                                                  | NM_001081417     |
| A_51_P290840 | 14.96621    | up         | NM_172475     | Frdm4a     | Mus musculus FERM domain containing 4A (Frdm4a), mRNA [NM_172475]                                                                                                     | NM_172475        |
| A_52_P556933 | 6.441222    | up         | NM_028266     | Col16a1    | Mus musculus procollagen, type XVI, alpha 1 (Col16a1), mRNA [NM_028266]                                                                                               | NM_028266        |
| A_51_P499854 | 1.748589    | up         | NM_010284     | Ghr        | Mus musculus growth hormone receptor (Ghr), transcript variant 1, mRNA [NM_010284]                                                                                    | NM_010284        |
| A_51_P450057 | 1.122329    | up         | NM_007708     | Cit        | Mus musculus citron (Cit), mRNA [NM_007708]                                                                                                                           | NM_007708        |
| A_52_P618132 | 1.17909     | up         | NM_172865     | Manea      | Mus musculus mannosidase, endo-alpha (Manea), mRNA [NM_172865]                                                                                                        | NM_172865        |
| A_51_P211934 | 1.588249    | up         | NM_138593     | Larp7      | Mus musculus La ribonucleoprotein domain family, member 7 (Larp7), mRNA [NM_138593]                                                                                   | NM_138593        |
| A_52_P218132 | 2.112158    | up         | AK083930      | Top1       | Mus musculus 12 days embryo spinal ganglion cDNA, RIKEN full-length enriched library, clone:D130064I21 product: topoisomerase I (Top1), mRNA [AK083930]               | AK083930         |
| A_52_P265996 | 1.430908    | up         | AK031375      | Odz4       | Mus musculus 13 days embryo male testis cDNA, RIKEN full-length enriched library, clone:6030416D17 product: odd Oz/4, mRNA [AK031375]                                 | AK031375         |
| A_52_P379531 | 4.835554    | up         | NM_011589     | Timeless   | Mus musculus timeless homolog (Drosophila) (Timeless), mRNA [NM_011589]                                                                                               | NM_011589        |
| A_52_P374997 | 9.670921    | up         | NM_178609     | E2f7       | Mus musculus E2F transcription factor 7 (E2f7), mRNA [NM_178609]                                                                                                      | NM_178609        |
| A_52_P249588 | 1.084398    | up         | NM_028043     | D1Bwg0212  | Mus musculus DNA segment, Chr 1, Brigham & Women's Genetics 0212 expressed (D1Bwg0212e), mRNA [NM_028043]                                                             | NM_028043        |
| A_52_P233255 | 3.062366    | up         | NM_053171     | Csmd1      | Mus musculus CUB and Sushi multiple domains 1 (Csmd1), mRNA [NM_053171]                                                                                               | NM_053171        |
| A_52_P530121 | 1.38253     | up         | NM_001081     | D430042O09 | Mus musculus RIKEN cDNA D430042O09 gene (D430042O09Rik), mRNA [NM_001081022]                                                                                          | NM_001081022     |
| A_52_P680935 | 1.489004    | up         | NM_010284     | Ghr        | Mus musculus growth hormone receptor (Ghr), transcript variant 1, mRNA [NM_010284]                                                                                    | NM_010284        |
| A_52_P597800 | 2.086194    | up         | NM_007961     | Etv6       | Mus musculus ets variant gene 6 (TEL oncogene) (Etv6), mRNA [NM_007961]                                                                                               | NM_007961        |
| A_52_P191193 | 1.762605    | up         | NM_172595     | Arl15      | Mus musculus ADP-ribosylation factor-like 15 (Arl15), mRNA [NM_172595]                                                                                                | NM_172595        |

|               |             |                   |            |                                                                                                                                    |                   |
|---------------|-------------|-------------------|------------|------------------------------------------------------------------------------------------------------------------------------------|-------------------|
| A_52_P421149  | 1.403726 up | XM_204015         | Rere       | PREDICTED: Mus musculus arginine glutamic acid dipeptide (RE) repeats, transcript variant 1 (Rere), mRNA [XM_204015]               | XM_204015         |
| A_52_P108021  | 1.266896 up | NM_001081022      | D430042O09 | Mus musculus RIKEN cDNA D430042O09 gene (D430042O09Rik), mRNA [NM_001081022]                                                       | NM_001081022      |
| A_52_P234214  | 1.6712 up   | AK083774          | Manea      | Mus musculus 12 days embryo spinal ganglion cDNA, RIKEN full-length enriched library, clone:D130006M08 product:unclassified        | AK083774          |
| A_52_P91563   | 1.175985 up | NM_008070         | Gabbr2     | Mus musculus gamma-aminobutyric acid (GABA-A) receptor, subunit beta 2 (Gabbr2), mRNA [NM_008070]                                  | NM_008070         |
| A_52_P446677  | 1.724954 up | NM_183163         | Rhbdl2     | Mus musculus rhomboid, veinlet-like 2 (Drosophila) (Rhbdl2), mRNA [NM_183163]                                                      | NM_183163         |
| A_51_P237878  | 2.971797 up | NM_027671         | Sntg1      | Mus musculus syntrophin, gamma 1 (Sntg1), mRNA [NM_027671]                                                                         | NM_027671         |
| A_52_P516733  | 1.05975 up  | NM_145959         | D15Ert621e | Mus musculus DNA segment, Chr 15, ERATO Doi 621, expressed (D15Ert621e), mRNA [NM_145959]                                          | NM_145959         |
| A_51_P155445  | 1.096393 up | NM_011076         | Abcb1a     | Mus musculus ATP-binding cassette, sub-family B (MDR/TAP), member 1A (Abcb1a), mRNA [NM_011076]                                    | NM_011076         |
| A_52_P360529  | 27.06769 up | AK089210          | Frmd4a     | Mus musculus NOD-derived CD11c +ve dendritic cells cDNA, RIKEN full-length enriched library, clone:F630038O13 product:unclassified | AK089210          |
| A_52_P278238  | 6.844258 up | AK016937          | Cep170     | Mus musculus adult male testis cDNA, RIKEN full-length enriched library, clone:4933426L22 product:KARP-1-BINDING PROTEIN           | AK016937          |
| A_52_P100506  | 1.167095 up | NM_145959         | D15Ert621e | Mus musculus DNA segment, Chr 15, ERATO Doi 621, expressed (D15Ert621e), mRNA [NM_145959]                                          | NM_145959         |
| A_52_P555423  | 2.31139 up  | NM_031199         | Tgfa       | Mus musculus transforming growth factor alpha (Tgfa), mRNA [NM_031199]                                                             | NM_031199         |
| A_51_P239884  | 1.014231 up | NM_172865         | Manea      | Mus musculus mannosidase, endo-alpha (Manea), mRNA [NM_172865]                                                                     | NM_172865         |
| A_52_P451123  | 1.155173 up | AK044403          | 1110003E0  | Mus musculus adult retina cDNA, RIKEN full-length enriched library, clone:A930011B09 product:unclassified, full insert             | AK044403          |
| A_51_P489034  | 1.437364 up | NM_177694         | Tmem16e    | Mus musculus transmembrane protein 16E (Tmem16e), mRNA [NM_177694]                                                                 | NM_177694         |
| A_52_P84217   | 1.172637 up | AK077982          | Ophn1      | Mus musculus 13 days embryo male testis cDNA, RIKEN full-length enriched library, clone:6030495I02 product:oligophrenin            | AK077982          |
| A_51_P479138  | 1.704777 up | NM_146547         | Olfr771    | Mus musculus olfactory receptor 771 (Olfr771), mRNA [NM_146547]                                                                    | NM_146547         |
| A_51_P396570  | 5.17464 up  | NM_011961         | Plod2      | Mus musculus procollagen lysine, 2-oxoglutarate 5-dioxygenase 2 (Plod2), mRNA [NM_011961]                                          | NM_011961         |
| A_52_P175821  | 1.123003 up | NM_001081417      | Chd7       | Mus musculus chromodomain helicase DNA binding protein 7 (Chd7), mRNA [NM_001081417]                                               | NM_001081417      |
| A_52_P117294  | 2.122613 up | NM_177136         | Fryl       | Mus musculus furry homolog-like (Drosophila) (Fryl), transcript variant 2, mRNA [NM_177136]                                        | NM_177136         |
| A_51_P380165  | 1.126158 up | NM_029337         | Ep400      | Mus musculus E1A binding protein p400 (Ep400), mRNA [NM_029337]                                                                    | NM_029337         |
| A_51_P432764  | 2.874419 up | NM_007547         | Sirpa      | Mus musculus signal-regulatory protein alpha (Sirpa), mRNA [NM_007547]                                                             | NM_007547         |
| A_51_P296013  | 2.592618 up | NM_007547         | Sirpa      | Mus musculus signal-regulatory protein alpha (Sirpa), mRNA [NM_007547]                                                             | NM_007547         |
| A_51_P515446  | 1.014488 up | NM_018887         | Cyp39a1    | Mus musculus cytochrome P450, family 39, subfamily a, polypeptide 1 (Cyp39a1), mRNA [NM_018887]                                    | NM_018887         |
| A_51_P137094  | 11.99095 up | NM_015772         | Sall2      | Mus musculus sal-like 2 (Drosophila) (Sall2), mRNA [NM_015772]                                                                     | NM_015772         |
| A_52_P491861  | 1.455853 up | NM_009282         | Stag1      | Mus musculus stromal antigen 1 (Stag1), mRNA [NM_009282]                                                                           | NM_009282         |
| A_51_P155152  | 1.781355 up | NM_020332         | Ank        | Mus musculus progressive ankylosis (Ank), mRNA [NM_020332]                                                                         | NM_020332         |
| A_52_P432289  | 1.877695 up | NM_023066         | Asph       | Mus musculus aspartate-beta-hydroxylase (Asph), transcript variant 1, mRNA [NM_023066]                                             | NM_023066         |
| A_52_P460687  | 1.01217 up  | NM_008070         | Gabbr2     | Mus musculus gamma-aminobutyric acid (GABA-A) receptor, subunit beta 2 (Gabbr2), mRNA [NM_008070]                                  | NM_008070         |
| A_51_P464539  | 3.448329 up | NM_153412         | Phldb2     | Mus musculus pleckstrin homology-like domain, family B, member 2 (Phldb2), mRNA [NM_153412]                                        | NM_153412         |
| A_51_P118468  | 4.105514 up | AK039235          | Cep170     | Mus musculus adult male spinal cord cDNA, RIKEN full-length enriched library, clone:A330004A13 product:hypothetical protein        | AK039235          |
| A_51_P507307  | 1.081933 up | NM_001081417      | Chd7       | Mus musculus chromodomain helicase DNA binding protein 7 (Chd7), mRNA [NM_001081417]                                               | NM_001081417      |
| A_52_P589622  | 12.34876 up | NM_008651         | Mybl1      | Mus musculus myeloblastosis oncogene-like 1 (Mybl1), mRNA [NM_008651]                                                              | NM_008651         |
| A_52_P640686  | 5.740226 up | AF086824          | Cit        | Mus musculus rho/rac-interacting citron kinase (Crik) mRNA, complete cds. [AF086824]                                               | AF086824          |
| A_52_P1115466 | 1.115215 up | AK020879          | Eif4enif1  | Mus musculus adult retina cDNA, RIKEN full-length enriched library, clone:A930019J01 product:unclassified, full insert             | AK020879          |
| A_52_P598774  | 1.358978 up | NM_001001182      | Baz2b      | Mus musculus bromodomain adjacent to zinc finger domain, 2B (Baz2b), mRNA [NM_001001182]                                           | NM_001001182      |
| A_51_P194249  | 1.842856 up | NM_019675         | Stmn4      | Mus musculus stathmin-like 4 (Stmn4), mRNA [NM_019675]                                                                             | NM_019675         |
| A_51_P429592  | 4.79948 up  | NM_053171         | Csmd1      | Mus musculus CUB and Sushi multiple domains 1 (Csmd1), mRNA [NM_053171]                                                            | NM_053171         |
| A_51_P357486  | 1.622504 up | NM_138593         | Larp7      | Mus musculus La ribonucleoprotein domain family, member 7 (Larp7), mRNA [NM_138593]                                                | NM_138593         |
| A_52_P533540  | 5.893283 up | ENSMUST0000070119 | Cep170     | centrosomal protein 170 [Source:MarkerSymbol;Acc:MGI:1918348] [ENSMUST0000070119]                                                  | ENSMUST0000070119 |
| A_51_P356931  | 3.865885 up | NM_011015         | Orc1l      | Mus musculus origin recognition complex, subunit 1-like (S.cerevisiae) (Orc1l), transcript variant A, mRNA [NM_011015]             | NM_011015         |
| A_51_P185071  | 1.127101 up | NM_146332         | Olfr135    | Mus musculus olfactory receptor 135 (Olfr135), mRNA [NM_146332]                                                                    | NM_146332         |
| A_52_P267451  | 1.272236 up | NM_009282         | Stag1      | Mus musculus stromal antigen 1 (Stag1), mRNA [NM_009282]                                                                           | NM_009282         |
| A_51_P187352  | 2.298994 up | NM_010610         | Kcnma1     | Mus musculus potassium large conductance calcium-activated channel, subfamily M, alpha member 1 (Kcnma1), mRNA [NM_010610]         | NM_010610         |
| A_51_P433887  | 1.277407 up | NM_011720         | Wnt8b      | Mus musculus wingless related MMTV integration site 8b (Wnt8b), mRNA [NM_011720]                                                   | NM_011720         |
| A_52_P125485  | 2.293351 up | NM_177809         | AU042651   | Mus musculus expressed sequence AU042651 (AU042651), mRNA [NM_177809]                                                              | NM_177809         |
| A_51_P450549  | 1.556345 up | NM_011060         | Padi3      | Mus musculus peptidyl arginine deiminase, type III (Padi3), mRNA [NM_011060]                                                       | NM_011060         |
| A_52_P631240  | 2.039531 up | AK029073          | Frmd4a     | Mus musculus 10 days neonate skin cDNA, RIKEN full-length enriched library, clone:4732488M06 product:similar to HYF                | AK029073          |
| A_52_P394755  | 1.015785 up | NM_152825         | Usp45      | Mus musculus ubiquitin specific petidase 45 (Usp45), mRNA [NM_152825]                                                              | NM_152825         |
| A_51_P394745  | 1.850025 up | AK009138          | Fryl       | Mus musculus adult male tongue cDNA, RIKEN full-length enriched library, clone:2310004H21 product:hypothetical protein             | AK009138          |
| A_51_P161037  | 6.654703 up | AK172953          | Cep170     | Mus musculus mRNA for mKIAA0470 protein. [AK172953]                                                                                | AK172953          |
| A_51_P241210  | 13.08977 up | NM_001081231      | Lhfp13     | Mus musculus lipoma HMGIC fusion partner-like 3 (Lhfp13), mRNA [NM_001081231]                                                      | NM_001081231      |

|              |             |           |            |                                                                                                                                       |              |
|--------------|-------------|-----------|------------|---------------------------------------------------------------------------------------------------------------------------------------|--------------|
| A_52_P477559 | 9.742324 up | NM_172475 | Frmd4a     | Mus musculus FERM domain containing 4A (Frmd4a), mRNA [NM_172475]                                                                     | NM_172475    |
| A_52_P680941 | 1.508557 up | NM_010284 | Ghr        | Mus musculus growth hormone receptor (Ghr), transcript variant 1, mRNA [NM_010284]                                                    | NM_010284    |
| A_51_P227564 | 3.707463 up | NM_027411 | Ccdc99     | Mus musculus coiled-coil domain containing 99 (Ccdc99), mRNA [NM_027411]                                                              | NM_027411    |
| A_52_P393488 | 2.291699 up | NM_029499 | Ms4a4c     | Mus musculus membrane-spanning 4-domains, subfamily A, member 4C (Ms4a4c), mRNA [NM_029499]                                           | NM_029499    |
| A_52_P86935  | 1.435047 up | NM_026779 | Mocos      | Mus musculus molybdenum cofactor sulfurase (Mocos), mRNA [NM_026779]                                                                  | NM_026779    |
| A_52_P170635 | 3.247001 up | NM_007547 | Sirpa      | Mus musculus signal-regulatory protein alpha (Sirpa), mRNA [NM_007547]                                                                | NM_007547    |
| A_51_P412768 | 1.459904 up | NM_009914 | Ccr3       | Mus musculus chemokine (C-C motif) receptor 3 (Ccr3), mRNA [NM_009914]                                                                | NM_009914    |
| A_51_P437559 | 3.512431 up | NM_011589 | Timeless   | Mus musculus timeless homolog (Drosophila) (Timeless), mRNA [NM_011589]                                                               | NM_011589    |
| A_51_P230287 | 3.268854 up | NM_030889 | Sorcs2     | Mus musculus sortilin-related VPS10 domain containing receptor 2 (Sorcs2), mRNA [NM_030889]                                           | NM_030889    |
| A_52_P403420 | 1.433174 up | AK081492  | Atp6v1h    | Mus musculus 16 days embryo head cDNA, RIKEN full-length enriched library, clone:C130021C16 product:hypothetical protein AK081492     | AK081492     |
| A_51_P317460 | 4.628732 up | NM_010824 | Mpo        | Mus musculus myeloperoxidase (Mpo), mRNA [NM_010824]                                                                                  | NM_010824    |
| A_52_P108023 | 1.12902 up  | NM_001081 | D430042O09 | Mus musculus RIKEN cDNA D430042O09 gene (D430042O09Rik), mRNA [NM_001081022]                                                          | NM_001081022 |
| A_52_P544052 | 1.364355 up | NM_001001 | Baz2b      | Mus musculus bromodomain adjacent to zinc finger domain, 2B (Baz2b), mRNA [NM_001001182]                                              | NM_001001182 |
| A_52_P404469 | 2.665476 up | AK162292  | Rhbdl2     | Mus musculus adult male colon cDNA, RIKEN full-length enriched library, clone:9030006F14 product:hypothetical protein AK162292        | AK162292     |
| A_52_P475229 | 1.203776 up | NM_029337 | Ep400      | Mus musculus E1A binding protein p400 (Ep400), mRNA [NM_029337]                                                                       | NM_029337    |
| A_52_P619991 | 1.631913 up | AK014834  | Them4      | Mus musculus adult male testis cDNA, RIKEN full-length enriched library, clone:4921507I02 product:weakly similar to C-AK014834        | AK014834     |
| A_52_P279845 | 2.953864 up | AK047881  | Sorcs2     | Mus musculus 16 days embryo head cDNA, RIKEN full-length enriched library, clone:C130019G06 product:VPS10 domain AK047881             | AK047881     |
| A_51_P223092 | 1.346762 up | NM_028106 | Zbed3      | Mus musculus zinc finger, BED domain containing 3 (Zbed3), mRNA [NM_028106]                                                           | NM_028106    |
| A_51_P103237 | 5.725899 up | NM_015755 | Hunk       | Mus musculus hormonally upregulated Neu-associated kinase (Hunk), mRNA [NM_015755]                                                    | NM_015755    |
| A_51_P444666 | 1.462685 up | NM_144830 | Tmem106a   | Mus musculus transmembrane protein 106A (Tmem106a), mRNA [NM_144830]                                                                  | NM_144830    |
| A_51_P291062 | 9.097803 up | NM_028266 | Col16a1    | Mus musculus procollagen, type XVI, alpha 1 (Col16a1), mRNA [NM_028266]                                                               | NM_028266    |
| A_52_P673971 | 1.872442 up | NM_009282 | Stag1      | Mus musculus stromal antigen 1 (Stag1), mRNA [NM_009282]                                                                              | NM_009282    |
| A_52_P194382 | 2.939632 up | NM_025850 | Fank1      | Mus musculus fibronectin type 3 and ankyrin repeat domains 1 (Fank1), mRNA [NM_025850]                                                | NM_025850    |
| A_52_P153700 | 2.833047 up | NM_153412 | Phldb2     | Mus musculus pleckstrin homology-like domain, family B, member 2 (Phldb2), mRNA [NM_153412]                                           | NM_153412    |
| A_52_P203741 | 3.366654 up | NM_009176 | St3gal3    | Mus musculus ST3 beta-galactoside alpha-2,3-sialyltransferase 3 (St3gal3), mRNA [NM_009176]                                           | NM_009176    |
| A_52_P155692 | 5.477172 up | NM_009176 | St3gal3    | Mus musculus ST3 beta-galactoside alpha-2,3-sialyltransferase 3 (St3gal3), mRNA [NM_009176]                                           | NM_009176    |
| A_51_P111462 | 1.792434 up | NM_172595 | Arl15      | Mus musculus ADP-ribosylation factor-like 15 (Arl15), mRNA [NM_172595]                                                                | NM_172595    |
| A_51_P446022 | 1.368964 up | AK052528  | D430042O09 | Mus musculus 13 days embryo lung cDNA, RIKEN full-length enriched library, clone:D430042O09 product:hypothetical protein AK052528     | AK052528     |
| A_51_P240019 | 1.227721 up | NM_013755 | Gyg        | Mus musculus glycogenin (Gyg), mRNA [NM_013755]                                                                                       | NM_013755    |
| A_52_P670950 | 1.175861 up | NM_029337 | Ep400      | Mus musculus E1A binding protein p400 (Ep400), mRNA [NM_029337]                                                                       | NM_029337    |
| A_52_P54106  | 2.634995 up | AK034547  | Ghr        | Mus musculus 12 days embryo embryonic body between diaphragm region and neck cDNA, RIKEN full-length enriched library, clone:AK034547 | AK034547     |
| A_51_P356552 | 1.442655 up | NM_007826 | Dach1      | Mus musculus dachshund 1 (Drosophila) (Dach1), transcript variant 1, mRNA [NM_007826]                                                 | NM_007826    |
| A_52_P636649 | 1.982663 up | AK048713  | Csmd1      | Mus musculus 0 day neonate cerebellum cDNA, RIKEN full-length enriched library, clone:C230015P12 product:unclassified AK048713        | AK048713     |
| A_51_P283044 | 1.618325 up | NM_011419 | Jarid1d    | Mus musculus jumonji, AT rich interactive domain 1D (Rbp2 like) (Jarid1d), mRNA [NM_011419]                                           | NM_011419    |
| A_51_P444669 | 1.427282 up | NM_144830 | Tmem106a   | Mus musculus transmembrane protein 106A (Tmem106a), mRNA [NM_144830]                                                                  | NM_144830    |
| A_52_P541833 | 1.475532 up | NM_177876 | Vps37b     | Mus musculus vacuolar protein sorting 37B (yeast) (Vps37b), mRNA [NM_177876]                                                          | NM_177876    |
| A_52_P479539 | 5.842863 up | AK047894  | Cit        | Mus musculus 16 days embryo head cDNA, RIKEN full-length enriched library, clone:C130020H05 product:unclassified AK047894             | AK047894     |
| A_51_P139184 | 1.884928 up | NM_025850 | Fank1      | Mus musculus fibronectin type 3 and ankyrin repeat domains 1 (Fank1), mRNA [NM_025850]                                                | NM_025850    |
| A_52_P418515 | 2.255601 up | NM_001024 | 1700007G11 | Mus musculus RIKEN cDNA 1700007G11 gene (1700007G11Rik), mRNA [NM_001024614]                                                          | NM_001024614 |
| A_52_P458853 | 1.439761 up | AK012459  | Brf2       | Mus musculus 11 days embryo whole body cDNA, RIKEN full-length enriched library, clone:2700059M06 product:BRF2, AK012459              | AK012459     |
| A_52_P267446 | 1.401976 up | NM_009282 | Stag1      | Mus musculus stromal antigen 1 (Stag1), mRNA [NM_009282]                                                                              | NM_009282    |
| A_52_P607075 | 8.226221 up | AK041481  | E2f7       | Mus musculus 3 days neonate thymus cDNA, RIKEN full-length enriched library, clone:A630014C11 product:hypothetical protein AK041481   | AK041481     |
| A_52_P100028 | 1.526413 up | NM_009035 | Rbpj       | Mus musculus recombination signal binding protein for immunoglobulin kappa J region (Rbpj), transcript variant 1, mRNA [NM_009035]    | NM_009035    |
| A_51_P280013 | 2.344587 up | NM_028194 | Fryl       | Mus musculus furry homolog-like (Drosophila) (Fryl), transcript variant 1, mRNA [NM_028194]                                           | NM_028194    |
| A_52_P309022 | 1.292373 up | NM_007826 | Dach1      | Mus musculus dachshund 1 (Drosophila) (Dach1), transcript variant 1, mRNA [NM_007826]                                                 | NM_007826    |

List of genes identified both from the microarray due to expression change and the comparative genomic hybridization analyses as gain or loss
